# Supplementary material for: Utility of a Paediatric Trigger Tool in a Norwegian department of paediatric and adolescent medicine
Source: PubMed Central journal article supplement — BMJ Open. 2014 May 17;4(5):e005011. doi: 10.1136/bmjopen-2014-005011 (PMC4039807; doi:10.1136/bmjopen-2014-005011), 2014-05-17
Supplement: bmjopen-2014-005011.draft_revisions.pdf [file bmjopen-2014-005011.draft_revisions.pdf]

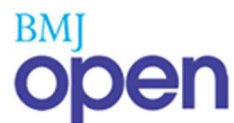

## Utility of a Pediatric Trigger Tool in a Norwegian Department of Pediatric and Adolescent Medicine

|                                 |                                                                                                                                                                                                                                                               |
|---------------------------------|---------------------------------------------------------------------------------------------------------------------------------------------------------------------------------------------------------------------------------------------------------------|
| Journal:                        | <i>BMJ Open</i>                                                                                                                                                                                                                                               |
| Manuscript ID:                  | bmjopen-2014-005011                                                                                                                                                                                                                                           |
| Article Type:                   | Research                                                                                                                                                                                                                                                      |
| Date Submitted by the Author:   | 06-Feb-2014                                                                                                                                                                                                                                                   |
| Complete List of Authors:       | Solevåg, Anne Lee; Akershus University Hospital, The Department of Pediatric and Adolescent Medicine<br>Nakstad, Britt; Akershus University Hospital, The Department of Pediatric and Adolescent Medicine; University of Oslo, Institute of Clinical Medicine |
| <b>Primary Subject Heading</b>: | Paediatrics                                                                                                                                                                                                                                                   |
| Secondary Subject Heading:      | Paediatrics                                                                                                                                                                                                                                                   |
| Keywords:                       | Paediatric intensive & critical care < PAEDIATRICS, Quality in health care < HEALTH SERVICES ADMINISTRATION & MANAGEMENT, Trigger tool systems                                                                                                                |
|                                 |                                                                                                                                                                                                                                                               |

SCHOLARONE™  
Manuscripts

1  
2  
3  
4 Title: Utility of a Pediatric Trigger Tool in a Norwegian Department of Pediatric and  
5 Adolescent Medicine  
6  
7  
8  
9

10  
11  
12  
13  
14  
15 Authors:

16 Anne Lee Solevåg<sup>1</sup>

17  
18  
19 Britt Nakstad<sup>1,2</sup>  
20  
21  
22

23  
24  
25 <sup>1</sup>The Department of Pediatric and Adolescent Medicine, Akershus University  
26 Hospital, 1478 Lørenskog, Norway  
27

28  
29 <sup>2</sup>Institute of Clinical Medicine, University of Oslo, Oslo, Norway  
30  
31  
32

33  
34 Corresponding author:

35  
36 Anne Lee Solevåg (MD, PhD), The Department of Pediatric and Adolescent  
37 Medicine, Akershus University Hospital, 1478 Lørenskog, Norway  
38  
39

40 Tlph: +47 67964520/+47 41469314, Fax: +47 67960900  
41  
42

43 E-mail: [a.l.solevag@medisin.uio.no](mailto:a.l.solevag@medisin.uio.no)  
44  
45  
46  
47  
48  
49

50 Keywords: Paediatrics, Quality in health care  
51  
52  
53  
54

55 Word count of abstract: 274

Word count: 3229  
56  
57  
58  
59  
60

## ABSTRACT

### Background

Trigger Tool Systems are retrospective methods that measure iatrogenic harm and have been used to identify areas of improvement and for monitoring change over time. The British National Health Service (NHS) Paediatric Trigger Tool (PTT) was made based on various trigger tools developed for use in adults. The PTT has not previously been developed or used in Nordic units. We aimed to investigate utility of the NHS PTT in children and adolescents in our department of pediatric and adolescent medicine.

### Methods

A convenience sample of medical and surgical patient contacts March-May 2011 were screened for triggers using the NHS PTT of 39 items. The type and rate of harm detected were compared to the department's voluntary incidence reports.

### Results

761 acute patient contacts representing 2268 patient days were included. Median age (IQR) for the trigger positive patients was 2.5 (1.0-8.0) years; range 0-18 years. We found only 20 out of the 39 NHS PTT triggers in 242 (31.8%) of the contacts. The highest number of triggers in a patient contact was 4. The most frequent trigger was re-admission within 30 days. Hypoxia which was the second most frequent trigger did not predict any patient harm. The PTT revealed a harm rate of 5% for medical patients, as compared to 0.5% in the incidence reports the same months. PTT screening revealed other types of harm than those reported by health care personnel themselves.

### Conclusion

This study showed that the NHS PTT, with certain modifications to our context could, as a supplement to voluntary incidence reporting, be used to calculate the rate of harm and identify areas of care where most harm events are occurring.

## ARTICLE SUMMARY

### Strengths and limitations of this study

- There is a limited understanding of how structured patient safety work in pediatrics can be performed
- We investigated utility of The British National Health Service Paediatric Trigger Tool (PTT) in a level II pediatric unit and found that the tool needs to be modified to different settings
- Previous to this study, only one major pediatric trigger tool has been published in peer review journal format and none have been applied in outpatient settings
- This review is based on a significant amount of patient data. However, the single-center character and the short study period call for additional studies, preferentially multicenter studies

## INTRODUCTION

By identifying recurring medical errors focused efforts can be made to improve patient safety.[1,2] However, medical errors do not always lead to harm to the patient. Patient harm can be caused by medical error, but can also occur as a result of a diagnostic or treatment procedure in the absence of a medical error.[3]

So-called ‘trigger tools’ focus on patient harm, not errors, and can in combination with more traditional incident reporting in healthcare help departments and hospitals focus their improvement work to reduce the overall rate of patient harm.[4] The global trigger tool (GTT) is a retrospective method for detecting iatrogenic harm [5] and has been used as a benchmarking system and means for monitoring change over time. A trigger has been defined as data present in the patient record that can directly or indirectly, by providing a clue for further investigation, represent an adverse event that caused patient harm.[6,7] The GTT has become a widely used tool in patient safety work. However, the understanding of health care-associated harm in children is limited as compared to adults and only recently a comprehensive pediatric trigger tool has been developed.[8]

The National Health Service (NHS) Paediatric Trigger Tool (PTT) was made based on various trigger tools for use in adults with the support of clinicians in nine UK hospitals, and was meant to be useful for district general hospitals, acute teaching hospitals and specialist pediatric centers.[4] However, there is a need for determining utility of such instruments derived from adult care in different institutions and contexts. The items comprising the PTT should be piloted in different settings in order to remove unnecessary or adult-oriented triggers and/or add more relevant triggers.[7]

Hence, we aimed to examine utility of the NHS PTT in the context of a large Nordic department of pediatrics and if needed adjust the tool for use in our patients.

Our primary focus was to examine if or to which extent the PTT detected patient harm in a typical Norwegian pediatric department like ours. A secondary aim was to assess utility of the different triggers, including predictive value of individual triggers for identifying harm.

## METHODS

The study was approved as part of quality improvement activities by the institutional review board at Akershus University Hospital (AHUS)

### Setting

AHUS is located outside the Norwegian capital Oslo. The hospital is the single largest acute hospital in Norway and offers a full range of medical services except cardiac- and neurosurgery, as well as treatment of severe traumatic injuries. The hospital introduced early warning scoring systems after this study. Routine GTT screening has been performed since 2007.

The Department of Pediatric and Adolescent Medicine is a 37-bed level II unit. Children and adolescents between zero and 18 years of age referred by general physicians for acute specialist care are examined in the children's emergency department (ED) and about 50% are admitted. AHUS does not have a pediatric intensive care unit (PICU), but transfers children below the age of 3 years to a nearby university hospital. Critically ill children between three and 18 years are treated in the intensive care unit (ICU) for adults in AHUS. Registration of patient harm in our unit is exclusively based on voluntary reporting through an electronic incidence reporting system called Extend Quality System (EQS).

### PTT screening

We did a manual review of unplanned patient visits to the children's ED using the NHS Paediatric Trigger Tool User guide.[4] For convenience, we included the visits that were documented for the purpose of evaluating the introduction of a pediatric early warning score in our department over a 3 month period.[9] These visits represented 95% of all contacts in the children's ED in the study months. Pediatric (medical), as well orthopedic, general surgical; and ear, nose and throat (ENT) patients below the age of 18 years were included and the results were recorded in Excel spreadsheets (Microsoft Excel 2008 for Mac (Redmond, WA, US)).

The PTT screening was performed by the primary investigator (ALS) who is a consultant pediatrician in the department. Because AHUS is the first hospital in Norway to screen for pediatric triggers, there are no courses or formal training in the

1  
2  
3 PTT available in Norway. Hence, to get a general idea about the concept of trigger  
4 tools, ALS attended a full-day course in the GTT organized by The Norwegian  
5 Knowledge Centre for the Health Services. In addition, she received instructions from  
6 the GTT team at AHUS based on their review methodology and PTT screening of 10  
7 patient records was performed in collaboration with a representative from the GTT  
8 team.  
9  
10

11  
12  
13 The PTT consists of 39 items described in Table 1. The patient records were reviewed  
14 in the following order: Diagnoses and treatment procedures, discharge summaries,  
15 medication charts, laboratory results, operation notes, nurse notes, physician notes and  
16 admission note. Because only half of the acute referrals result in an admission, our  
17 practice differs from most medical departments for adults where a larger proportion of  
18 acutely referred patients are being admitted. The PTT user guide dictates a minimum  
19 length of stay of 8 hours.[4] However, as we argue that our threshold for admitting  
20 patients from the children's ED is high with often only slight differences in disease  
21 severity and complexity between those who are admitted and those who are not, we  
22 included also acute outpatient visits in our screening. Further, we chose to register all  
23 patient contacts with the diagnoses hypo-/hyperkalemia and/or hypo-/hypernatremia  
24 as trigger positive regardless of the definitions used in the PTT user guide for these  
25 triggers (Table 1). Otherwise, we strictly followed the definitions and guidelines  
26 outlined in the user guide.  
27  
28  
29  
30  
31  
32  
33  
34  
35  
36

37  
38 The PTT uses an adapted version of the National Coordinating Council for  
39 Medication Error Reporting and Prevention (NCC MERP) 'Index for Categorizing  
40 Errors'. [10] The rationale for this is that the NHS focuses on adverse events that  
41 cause actual patient harm and not medical errors that have a potential for patient  
42 harm. Therefore, only the NCC MERP categories E through I are included:  
43 Temporary harm to the patient and required intervention (category E), temporary  
44 harm to the patient and required initial or prolonged hospitalization (category F),  
45 permanent patient harm (category G), intervention required to sustain life (category  
46 H), and patient death (category I).  
47  
48  
49  
50  
51  
52

53  
54 Harm identified through PTT screening was compared to harm identified through  
55 voluntary incidence reports in the department.  
56  
57

### 58 **Voluntary incidence reporting**

59  
60

1  
2  
3 ALS read and classified patient related incidents regarding pediatric (medical)  
4 patients reported in the EQS in March until May 2011. The rate of harm reported in  
5 incidence reports during these three months was low. Therefore all reports in an  
6 extended period of time, 2010-2012, were included for comparison to the PTT results.  
7  
8 Patient harm identified in the incidence reports was classified from E through I for  
9 comparison to the findings from the PTT screening.  
10  
11  
12

### 13 14 **Statistical analyses**

15  
16 Data were analyzed using PASW<sup>®</sup> Statistics 18.0 software (SPSS Inc., Chicago, IL).  
17 Comparisons between groups were made using the Chi-square test for categorical  
18 variables and Mann-Whitney *U* test for continuous variables. P-values <0.05 were  
19 considered significant. Positive predictive value (PPV) for triggers was calculated and  
20 we calculated number of harm events per 1000 patient days and 100 patient contacts.  
21  
22  
23  
24  
25  
26  
27  
28  
29  
30  
31  
32  
33  
34  
35  
36  
37  
38  
39  
40  
41  
42  
43  
44  
45  
46  
47  
48  
49  
50  
51  
52  
53  
54  
55  
56  
57  
58  
59  
60



## RESULTS

From March 15<sup>th</sup> until May 31<sup>st</sup> 2011 761 patient records, representing 2268 patient days were screened for triggers. Median age (IQR) in years was 3.5 (1.2-11.0) for all patients and 2.5 (1.0-8.0) for the trigger positive patients. Male to female ratio was 352:409 and 113:129 for all patients and the trigger positive patients, respectively.

We identified 20 out of the 39 different NHS triggers in 242 (31.8%) of all patient contacts. In 71.5% of the trigger positive contacts only one trigger was found. The highest number of triggers found in a patient contact was 4. The mean rate of triggers per patient was 1.4.

The most frequently found trigger was re-admission within 30 days. 52.5 % of outpatient visits were an unplanned re-admission or were followed by an unplanned readmission within 30 days and 42.8% of admissions were or were followed by an unplanned readmission within 30 days. Common reasons for unplanned readmission were surgical site infection, recurrent (respiratory tract) infections, postoperative bleeding and seizures. We found the second most common trigger in our screening to be hypoxia, but no patient harm was associated with this specific trigger.

Of the 242 trigger positive contacts, 177 (73.1%) were admissions and 65 (26.9%) acute outpatient visits. Table 2 shows how trigger positive admissions and outpatient contacts were distributed across specialties.

We identified 48 incidents of harm, representing 21 harm events per 1000 patient days and 6 harm events per 100 consultations.

The PPV of one or more triggers for identifying harm was 19.8%. When calculations were made for admissions (n= 761) and outpatient care (n= 242) separately, PPV was 23.2% and 10.8%, respectively (p=0.03). When we looked at the PPV of individual triggers, PPV varied from zero in the case of hypoxia, thrombocytopenia and electrolyte abnormalities to 100% in the case of surgical site infection and nosocomial pneumonia (Table 3).

The distribution of the 48 patients with identified harm according to status as admitted or outpatient, as well as their distribution across specialties are presented in Table 2. 60.4% of the harm events were in the pediatric (medical) patients, whereas 22.9%

1  
2  
3 occurred in ENT-patients, 10.4% in orthopedic and 6.3% in general surgical patients.  
4

5 Harm was detected in 5% of all pediatric contacts with a slightly higher rate of 7% in  
6 pediatric admissions. The incidence of harm in all contacts including surgical and  
7 ENT patients and in admissions only regardless of specialty was similar, 6.3% and  
8 8.3%, respectively.  
9  
10

11 Table 4 shows rate of trigger positive contacts, rate of harm and PPV of positive  
12 triggers across specialties.  
13

14 All, but two identified harm events were categorized as harm category F, 'Temporary  
15 harm to the patient and required initial or prolonged hospitalization'.  
16  
17

18 Examples of harm were postoperative pericarditis, ileus after gastrostomy, candida  
19 stomatitis after treatment with antibiotics, infection in percutaneous endoscopic  
20 gastrostomy, bleeding following placement of nasogastric feeding tube (harm  
21 category E) and nosocomial infection (gastroenteritis, pneumonia) for the pediatric  
22 patients. In orthopedic patients osteomyelitis after pinning of Bennet's fracture was  
23 found and in general surgical patients hematoma after hernia operation (outpatient:  
24 harm category E) was found. In the ENT patients bleeding, infection and/or  
25 dehydration following adenotonsillectomy were recurring harms.  
26  
27  
28  
29  
30  
31  
32  
33

### 34 35 **Voluntary incidence reports** 36

37 The majority of incidents reported were minor incidents like delay in medication  
38 administration not leading to patient harm.  
39  
40

41 Patient harm as defined by the PTT user guide was found in 51/160 (30.9%) of the  
42 incidence reports 2010-2012. 37 harm events were classified as harm category E, 8  
43 category F, 3 category G, 1 category H and 2 category I. This equals 51/5854 (total  
44 number of patients admitted acutely with medical diagnoses 2010-2012) = 0.9%. Only  
45 three of these incidents were reported in the PTT study months giving a voluntary  
46 reported harm rate of 3/584 (number of pediatric patients in the PTT screening) =  
47 0.5% in March-May 2011.  
48  
49  
50  
51  
52

53 Patient harm reported through the incidence reporting system included unexpected  
54 patient death; fall injury; pain and swelling from subcutaneous peripheral venous  
55  
56  
57  
58  
59  
60

1  
2  
3 catheter; complications to procedure; anaphylactic drug reactions; and prolonged  
4 hospitalization due to errors in medication and fluid administration.  
5  
6  
7  
8  
9  
10  
11  
12  
13  
14  
15  
16  
17  
18  
19  
20  
21  
22  
23  
24  
25  
26  
27  
28  
29  
30  
31  
32  
33  
34  
35  
36  
37  
38  
39  
40  
41  
42  
43  
44  
45  
46  
47  
48  
49  
50  
51  
52  
53  
54  
55  
56  
57  
58  
59  
60

For peer review only

## DISCUSSION

This is the first report about use of a PTT in a European unit. Despite the fact that only half of the NHS pediatric triggers were found in the patient records screened in this study, we identified a ten times higher harm rate using the PTT than what was reported in the department's voluntary incidence reports in the same period.

Our pediatric centre is the largest acute pediatric unit in Norway, but we do not have a PICU in our hospital. Therefore, we do not treat the most severely ill children, and we only rarely use potent anesthesia medications. This may be one of the reasons why half of the NHS triggers were not found in our review, reflecting that some diagnoses and interventions with a high incidence of complications are not present in the children and adolescents in our unit.

In the recently published Canadian Pediatric Adverse Events Study, the incidence, type and severity of harm among children admitted to academic pediatric centers were compared with those admitted to community hospitals in Canada.[8] In that study, significantly more patient records from academic pediatric centers (38.8%) than from community hospitals (21.6%) were trigger-positive.[8] We found triggers in 31.8% of our patients. The overall rate of harm in the Canadian study was 9.2% with significantly more harm in academic pediatric centers (11.2%) than in community hospitals (3.3%). We found a total rate of harm in admitted children of 8.3%. These results might reflect that, although being an academic teaching unit, our center probably has a patient population with disease severity and complexity somewhere in between the two compared unit levels in the Canadian study.

Kirkendall et al.[7] found 37 harm events per 100 patients and 76 harm events per 1000 patient-days, a significantly higher rate than in our patients. One of the reasons for this may be that the study was conducted in a large US tertiary centre where 32.5% of the patients went to the operating room during their hospital stay and 13.3% were admitted to an ICU during part of or whole stay.

We found a PPV of one or more triggers of 19.8% when both acute outpatient contacts and admissions were included and a higher PPV when only admissions were analyzed. Lemon and Stockwell found a PPV of 34%.[6] One of the possible reasons

1  
2  
3 for this difference is that Lemon and Stockwell only screened for 11 triggers while we  
4 identified 20 different triggers, of which some had an individual PPV of zero.  
5  
6

7 An important question when performing harm assessment in the PTT is what can be  
8 defined as anticipated side effects of medical treatment and calculated risk and what  
9 should be defined as iatrogenic harm. Is for example chemotherapy induced leuko- or  
10 neutropenia preventable? If the purpose of trigger tool systems is to focus attention  
11 towards areas of improvement, harm that cannot be prevented by change in routines  
12 and procedures should not necessarily be registered in this system. Lemon and  
13 Stockwell classifies harm either as being preventable or nonpreventable[6] whereas  
14 Kirkendall et al. did not assess preventability.[7]  
15  
16  
17  
18  
19  
20

21 Another issue raised is whether only “active delivery of harm” or also omission or  
22 substandard care should count as harm in the PTT system.[7] According to the  
23 Institute for Healthcare Improvement,[11] harm includes only those adverse events  
24 related to the active delivery of harm and not issues related to omission.  
25  
26  
27  
28

29 Like Kirkendall et al.,[7] we found that some modules, in our case the laboratory  
30 module, contained adult-oriented triggers like high INR and diagnostic imaging for  
31 embolus that are not applicable to our population and therefore not identified in our  
32 chart review. Removal of unnecessary triggers would reduce the overall number of  
33 triggers that reviewers must consider. Hypoxia, electrolyte abnormalities and  
34 thrombocytopenia had a PPV of zero and may not be worthwhile screening for in our  
35 patient population. However, bearing in mind the short study period of 3 months,  
36 further studies, ideally multicenter studies are needed before abolishment of some  
37 triggers.  
38  
39  
40  
41  
42  
43

44 Some triggers, e.g. complication of procedure or treatment and surgical site infection  
45 are themselves examples of harm. Nosocomial pneumonia and surgical site infection  
46 both had a PPV of 100% in our patients.  
47  
48  
49

### 50 **PTT versus voluntary incidence reporting**

51

52 It has become evident from our study that patient harm identified through incidence  
53 report analysis and PTT screening are different in number and character in our unit.  
54 One of the most frequently reported error leading to harm in the incidence reports,  
55 ‘Error in medication/fluid therapy routines’ could not be detected through the PTT  
56  
57  
58  
59  
60

1  
2  
3 medication module that only detects medication errors requiring antidote, antihista-  
4 mine and/or antiemetics; as well as abrupt medication stop.  
5  
6

### 7 **Practical use of the PTT**

8  
9  
10 Trigger tool systems can be used for regular manual screening of a random pick of  
11 patient records. It is commonly said that the time spent for screening of individual  
12 charts should be limited to 20 minutes. Alternatively, automated electronic screening  
13 of all patient records can be performed.  
14  
15

16  
17 To our knowledge, we are the first group to report the use of a PTT for unplanned  
18 outpatient visits. Some trigger tools exist for outpatient care,[12,13] however they are  
19 not suitable for children and adolescents. As harm was detected in 7/267 (2.6%) of  
20 acute outpatient visits, we believe that identification of these events is important in a  
21 unit like ours where the number of acute outpatient visits is substantial.  
22  
23  
24

25  
26 Regardless, there seems to be a higher PPV of triggers in surgical patients, but the rate  
27 of harm was comparable across medical and surgical patients (5-6%), excluding ENT  
28 patients with a 35% total harm rate.  
29  
30

31  
32 Needless to say, the extent to which trigger tools detect harm as intended depends to a  
33 large extent on routines for documentation. Like Kirkendall et al.,[7] we noticed that  
34 frequently occurring complications like complications to peripheral venous catheters  
35 (e.g. phlebitis, subcutaneous edema, tissue necrosis and infection) are infrequently  
36 documented in the records of the patients in our unit. The same applies to the  
37 incidence reporting system that contains information about only a small fraction of  
38 these types of patient harm. Hence, certain types of patient harm that are frequently  
39 occurring and should be targeted by interventions are not detected in their full extent  
40 neither with the PTT nor through voluntary incidence reporting.  
41  
42  
43  
44  
45  
46  
47

### 48 **Limitations of the study**

49  
50 The PTT screening and incident report analyses were performed by only one  
51 investigator, and inter-rater agreement could not be assessed in this study. Also, this  
52 was a relatively small single-center study and the study period was short. Some of the  
53 triggers that were not identified during the three study months could possibly have  
54 been detected if we screened for a longer period. Generalizability of our results may  
55  
56  
57  
58  
59  
60

1  
2  
3 be limited to contexts with similar organization of specialist healthcare including  
4 referral practices. However, it is important that utility studies performed in different  
5 context be published in order for clinicians to judge applicability of the results to their  
6 practice.  
7  
8  
9  
10  
11  
12  
13  
14  
15  
16  
17  
18  
19  
20  
21  
22  
23  
24  
25  
26  
27  
28  
29  
30  
31  
32  
33  
34  
35  
36  
37  
38  
39  
40  
41  
42  
43  
44  
45  
46  
47  
48  
49  
50  
51  
52  
53  
54  
55  
56  
57  
58  
59  
60

For peer review only

## CONCLUSION

Using the NHS Paediatric Trigger tool we found a rate of trigger positive contacts and a rate of harm comparable to an extensive Canadian review. The PTT made us able to detect more harm among our children and adolescents than what we detect by our routine system for reporting patient harm.

We conclude that the presence of adult-oriented triggers, triggers that were not identified at all, as well as triggers with a low predictive value for harm, highlight the need for modification of trigger tools to the context in which they are intended to be used. The NHS PTT, with certain modifications to our context can, as a supplement to voluntary incidence reporting, be used to calculate the rate of harm and identify areas of care where most harm events are occurring. Hence, it may inform priorities for action and track improvements over time.

## ACKNOWLEDGEMENT

The authors wish to thank Gunnvor Flaa Marum in the AHUS GTT team for assisting in the PTT screening.

## CONTRIBUTOR STATEMENT

ALS was the lead author for this paper and involved in all stages including design of the research, acquisition of data, analysis and interpretation of the data and statistical analysis. BN contributed to the drafting of the manuscript, critical revision of the manuscript and supervision.

## FUNDING

None

## DATA SHARING STATEMENT

No additional data available



**REFERENCES**

1. Kohn LT, Corrigan J, Donaldson MS (2000) To err is human : building a safer health system. Washington, D.C.: National Academy Press. xxi, 287 p. p.
2. Leape LL, Woods DD, Hatlie MJ, Kizer KW, Schroeder SA, et al. Promoting patient safety by preventing medical error. JAMA 1998;280:1444-1447.
3. Layde PM, Cortes LM, Teret SP, Brasel KJ, Kuhn EM, et al. Patient safety efforts should focus on medical injuries. JAMA 2002;287:1993-1997.
4. NHS Institute for Innovation and Improvement (2010) The Paediatric Trigger Tool User Guide. Coventry: NHS Institute for Innovation and Improvement.
5. Griffin F RR (2009) IHI Global Trigger Tool for measuring adverse events. Cambridge, Massachusetts.
6. Lemon V, Stockwell DC. Automated detection of adverse events in children. *Pediatr Clin North Am* 2012;59:1269-1278.
7. Kirkendall ES, Kloppenborg E, Papp J, White D, Frese C, et al. Measuring adverse events and levels of harm in pediatric inpatients with the Global Trigger Tool. *Pediatrics* 2012;130:e1206-1214.
8. Matlow AG, Baker GR, Flintoft V, Cochrane D, Coffey M, et al. Adverse events among children in Canadian hospitals: the Canadian Paediatric Adverse Events Study. *CMAJ* 2012;184:E709-718.
9. Solevag AL, Eggen EH, Schroder J, Nakstad B. Use of a modified pediatric early warning score in a department of pediatric and adolescent medicine. *PLoS One* 2013;8:e72534.
10. National Coordinating Council for Medication Error Reporting and Prevention (NCC MERP) (1996, revised 2001) National Coordinating Council for Medication Error Reporting and Prevention (NCC MERP) Taxonomy of Medication Errors; Available at <http://www.NCCMERP.org>.
11. Griffin FA RR (2009) HI Global Trigger Tool for Measuring Adverse Events. Cambridge: Institute for Healthcare Improvement.
12. Gandhi TK, Seger AC, Overhage JM, Murray MD, Hope C, et al. Outpatient adverse drug events identified by screening electronic health records. *J Patient Saf* 2010;6:91-96.
13. Institute for Healthcare Improvement (2011) IHI Outpatient Adverse Event Trigger Tool. In: Improvement IfH, editor. Cambridge.

Table 1 The Paediatric Trigger Tool (PTT) items as depicted in the NHS PTT User Guide[4]

|                       | <b>Item</b>                                                              |
|-----------------------|--------------------------------------------------------------------------|
| <b>General care</b>   | PG1 Early warning score                                                  |
|                       | PG2 Tissue damage or pressure ulcer                                      |
|                       | PG3 Readmission within 30 days                                           |
|                       | PG4 Unplanned admission                                                  |
|                       | PG5 Abnormal cranial imaging                                             |
|                       | PG6 Respiratory or cardiac arrest / crash calls                          |
|                       | PG7 Diagnostic imaging for embolus / thrombus +/- confirmation           |
|                       | PG8 Complication of procedure or treatment                               |
|                       | PG9 Transfer to higher level of care                                     |
|                       | PG10 Hypoxia O2 sat <85%                                                 |
|                       | PG11 Cancelled elective procedure / delayed discharge                    |
| <b>Surgical care</b>  | PS1 Return to theatre                                                    |
|                       | PS2 Change in planned procedure                                          |
|                       | PS3 Surgical site infection or hospital acquired urinary tract infection |
|                       | PS4 Removal/injury/repair of organ                                       |
| <b>Intensive care</b> | IP1 Readmission to Intensive Care or High Dependency Care                |
| <b>Medication</b>     | PM1 Vitamin K (except for routine dose in neonates)                      |
|                       | PM2 Naloxone                                                             |
|                       | PM3 Flumazenil (Romazicon)                                               |
|                       | PM4 Glucagon or glucose $\geq 10\%$                                      |
|                       | PM5 Chlorphenamine or antihistamine                                      |
|                       | PM6 Anti-emetics                                                         |
|                       | PM7 IV Bolus $\geq 10\text{ml/kg}$ colloid or crystalloid given          |
|                       | PM8 Abrupt medication stop                                               |
| <b>Lab test</b>       | PL15 Thrombocytopenia (platelets <100)                                   |
|                       | PL1 High INR >5 or aPTT >100                                             |
|                       | PL2 Transfusion                                                          |
|                       | PL3 Abrupt drop in Hb or Hct (>25%)                                      |
| <b>Biochemistry</b>   | PL4 Rising urea or creatinine (>2x baseline)                             |
|                       | PL5/PL6 Electrolyte abnormalities (Na+ <130 or >150, K+ <3.0 or >6.0)    |
|                       | PL7 Hypoglycemia (<3mmol/l)                                              |
|                       | PL8 Hyperglycemia (>12mmol/l)                                            |
|                       | PL9 Drug level out of range                                              |
| <b>Microbiology</b>   | PL10 MRSA bacteraemia                                                    |
|                       | PL11 C. difficile                                                        |
|                       | PL12 Vanc resistant enterococcus (VRE)                                   |
|                       | PL13 Nosocomial pneumonia                                                |
|                       | PL14 Positive blood culture                                              |
| <b>Other</b>          | PO1 Other event                                                          |

Table 2 Distribution of trigger positive admissions and outpatient contacts across specialties

|                        | Pediatric |            | Ortopedic |            | General surgical |            | Ear, nose and throat |            |
|------------------------|-----------|------------|-----------|------------|------------------|------------|----------------------|------------|
|                        | Admitted  | Outpatient | Admitted  | Outpatient | Admitted         | Outpatient | Admitted             | Outpatient |
| Total n (%)            | 356 (47)  | 228 (30)   | 70 (9)    | 13 (2)     | 41 (5)           | 22 (3)     | 27 (3.5)             | 4 (0.5)    |
| Trigger positive n (%) | 148 (61)  | 59 (24.5)  | 8 (3.5)   | 3 (1)      | 10 (4)           | 2 (1)      | 11 (4.5)             | 1 (0.5)    |
| Harm n                 | 26        | 3          | 3         | 2          | 1                | 2          | 11                   | 0          |

Table 3 The triggers we identified in our study are presented with positive predictive value (PPV) for identifying harm. The numerator represents number of harm events and the denominator how many times each individual trigger was found in all patient contacts (n=761)

|                       | Item                                                                     | PPV          |
|-----------------------|--------------------------------------------------------------------------|--------------|
| <b>General care</b>   | PG1 Early warning score                                                  |              |
|                       | PG2 Tissue damage or pressure ulcer                                      |              |
|                       | PG3 Readmission within 30 days                                           | 24/175=13.7% |
|                       | PG4 Unplanned admission                                                  |              |
|                       | PG5 Abnormal cranial imaging                                             |              |
|                       | PG6 Respiratory or cardiac arrest / crash calls                          | 0/1=0%       |
|                       | PG7 Diagnostic imaging for embolus / thrombus +/- confirmation           | 1/2=50%      |
|                       | PG8 Complication of procedure or treatment                               | 17/23=73.9%  |
|                       | PG9 Transfer to higher level of care                                     | 3/22=13.6%   |
|                       | PG10 Hypoxia O2 sat <85%                                                 | 0/25=0%      |
|                       | PG11 Cancelled elective procedure / delayed discharge                    | 1/1=100%     |
| <b>Surgical care</b>  | PS1 Return to theatre                                                    | 1/1=100%     |
|                       | PS2 Change in planned procedure                                          |              |
|                       | PS3 Surgical site infection or hospital acquired urinary tract infection | 6/6=100%     |
|                       | PS4 Removal/injury/repair of organ                                       |              |
| <b>Intensive care</b> | IP1 Readmission to Intensive Care or High Dependency Care                |              |
| <b>Medication</b>     | PM1 Vitamin K (except for routine dose in neonates)                      |              |
|                       | PM2 Naloxone                                                             |              |
|                       | PM3 Flumazenil (Romazicon)                                               |              |
|                       | PM4 Glucagon or glucose $\geq 10\%$                                      |              |
|                       | PM5 Chlorphenamine or antihistamine                                      | 0/1=0%       |
|                       | PM6 Anti-emetics                                                         |              |
|                       | PM7 IV Bolus $\geq 10\text{ml/kg}$ colloid or crystalloid given          | 3/19=15.8%   |
|                       | PM8 Abrupt medication stop                                               |              |
| <b>Lab test</b>       | PL15 Thrombocytopenia (platelets <100)                                   | 0/7=0%       |
|                       | PL1 High INR >5 or aPTT >100                                             |              |
|                       | PL2 Transfusion                                                          | 2/8=25%      |
|                       | PL3 Abrupt drop in Hb or Hct (>25%)                                      | 2/8=25%      |
| <b>Biochemistry</b>   | PL4 Rising urea or creatinine (>2x baseline)                             | 0/1=0%       |
|                       | PL5/PL6 Electrolyte abnormalities (Na+ <130 or >150, K+ <3.0 or >6.0)    | 0/12=0%      |
|                       | PL7 Hypoglycemia (<3mmol/l)                                              | 3/8=37.5%    |
|                       | PL8 Hyperglycemia (>12mmol/l)                                            | 0/1=0%       |
|                       | PL9 Drug level out of range                                              |              |
| <b>Microbiology</b>   | PL10 MRSA bacteraemia                                                    |              |
|                       | PL11 C. difficile                                                        |              |
|                       | PL12 Vanc resistant enterococcus (VRE)                                   |              |
|                       | PL13 Nosocomial pneumonia                                                | 2/2=100%     |
|                       | PL14 Positive blood culture                                              | 1/1=100%     |
| <b>Other</b>          | PO1 Other event                                                          |              |

Table 4 Rate of trigger positive contacts, rate of harm and positive predictive value (PPV) of positive triggers across specialties

| Specialty            | Rate of trigger positive contacts | Rate of harm  | PPV   |
|----------------------|-----------------------------------|---------------|-------|
| Pediatric            | 207/584 (35.4%)                   | 29/584 (5.0%) | 14%   |
| Orthopedic surgery   | 11/83 (13.3%)                     | 5/83 (6.0%)   | 45.5% |
| General surgery      | 12/63 (19.0%)                     | 3/63 (4.8%)   | 25%   |
| Ear, Nose and Throat | 12/31 (38.7%)                     | 11/31 (35.5%) | 91.7% |
| Total                | 242/761 (31.8%)                   | 48/761 (6.3%) | 19.8% |

# BMJ Open

## Utility of a Pediatric Trigger Tool in a Norwegian Department of Pediatric and Adolescent Medicine

|                                 |                                                                                                                                                                                                                                                               |
|---------------------------------|---------------------------------------------------------------------------------------------------------------------------------------------------------------------------------------------------------------------------------------------------------------|
| Journal:                        | <i>BMJ Open</i>                                                                                                                                                                                                                                               |
| Manuscript ID:                  | bmjopen-2014-005011.R1                                                                                                                                                                                                                                        |
| Article Type:                   | Research                                                                                                                                                                                                                                                      |
| Date Submitted by the Author:   | 10-Mar-2014                                                                                                                                                                                                                                                   |
| Complete List of Authors:       | Solevåg, Anne Lee; Akershus University Hospital, The Department of Pediatric and Adolescent Medicine<br>Nakstad, Britt; Akershus University Hospital, The Department of Pediatric and Adolescent Medicine; University of Oslo, Institute of Clinical Medicine |
| <b>Primary Subject Heading</b>: | Paediatrics                                                                                                                                                                                                                                                   |
| Secondary Subject Heading:      | Paediatrics                                                                                                                                                                                                                                                   |
| Keywords:                       | Paediatric intensive & critical care < PAEDIATRICS, Quality in health care < HEALTH SERVICES ADMINISTRATION & MANAGEMENT, Trigger tool systems                                                                                                                |
|                                 |                                                                                                                                                                                                                                                               |

SCHOLARONE™  
Manuscripts

1  
2  
3  
4 Title: Utility of a Pediatric Trigger Tool in a Norwegian Department of Pediatric and  
5 Adolescent Medicine  
6  
7  
8  
9

10  
11  
12  
13  
14  
15 Authors:

16 Anne Lee Solevåg<sup>1</sup>

17  
18  
19 Britt Nakstad<sup>1,2</sup>  
20  
21  
22  
23

24  
25 <sup>1</sup>The Department of Pediatric and Adolescent Medicine, Akershus University  
26 Hospital, 1478 Lørenskog, Norway  
27

28  
29 <sup>2</sup>Institute of Clinical Medicine, University of Oslo, Oslo, Norway  
30  
31  
32

33  
34 Corresponding author:

35  
36 Anne Lee Solevåg (MD, PhD), The Department of Pediatric and Adolescent  
37 Medicine, Akershus University Hospital, 1478 Lørenskog, Norway  
38

39  
40 Tlph: +47 67964520/+47 41469314, Fax: +47 67960900  
41  
42

43 E-mail: [a.l.solevag@medisin.uio.no](mailto:a.l.solevag@medisin.uio.no)  
44  
45  
46  
47  
48  
49

50 Keywords: Paediatrics, Quality in health care  
51  
52  
53  
54

55 Word count of abstract: 299

Word count: 2997  
56  
57  
58  
59  
60

## ABSTRACT

### Objectives

The British National Health Service (NHS) Paediatric Trigger Tool (PTT) was made based on various trigger tools developed for use in adults. The PTT has not previously been developed or used in Nordic units. We aimed to compare harm identified through PTT screening with voluntary incidence reports in our department. A secondary aim was to assess utility of the different triggers, including predictive value for identifying harm. We hypothesized that the NHS PTT would need adjustments for the setting in which it is used.

### Setting

A Norwegian level II department of pediatric and adolescent medicine.

### Participants

A convenience sample of 761 acute medical and surgical patient contacts March-May 2011. Median age (IQR) for the trigger positive patients was 2.5 (1.0-8.0) years; range 0-18 years.

### Primary and secondary outcome measures

The type and rate of identified harm compared to the department's voluntary incidence reports. The type and rate of identified triggers and positive predictive value for harm.

### Results

The PTT revealed a harm rate of 5% for medical patients, as compared to 0.5% in the incidence reports the same months. PTT screening revealed other types of harm than those reported by health care personnel themselves. We identified only 20 out of the 39 NHS PTT triggers. The most frequent trigger was re-admission within 30 days. Hypoxia, which was the second most frequent trigger, did not predict any patient harm.

### Conclusion

This study showed that the NHS PTT identifies more and other types of harm than voluntary incidence reports. The presence of adult-oriented triggers, triggers that were



1  
2  
3 not identified at all, as well as triggers with a low predictive value for harm may  
4 indicate the need for modification of the PTT to different settings. More studies are  
5 needed before a final decision is made to exclude triggers from the screening.  
6  
7  
8  
9

## 10 11 **ARTICLE SUMMARY**

12  
13 Strengths and limitations of this study

- 14  
15 ○ There is a limited understanding of how structured patient safety work in  
16  
17 pediatrics can be performed
- 18  
19 ○ We investigated utility of The British National Health Service Paediatric  
20  
21 Trigger Tool (PTT) in a level II pediatric unit and found that the tool should  
22  
23 probably be modified to different settings
- 24  
25 ○ Previous to this study, only one major pediatric trigger tool has been published  
26  
27 in peer review journal format and none have been applied in outpatient  
28  
29 settings
- 30  
31 ○ This review is based on a significant amount of patient data. However, the  
32  
33 single-center character and the short study period call for additional studies,  
34  
35 preferentially multicenter studies  
36  
37  
38  
39  
40  
41  
42  
43  
44  
45  
46  
47  
48  
49  
50  
51  
52  
53  
54  
55  
56  
57  
58  
59  
60

## INTRODUCTION

By identifying recurring medical errors focused efforts can be made to improve patient safety.[1,2] However, medical errors do not always lead to harm to the patient. Patient harm can be caused by medical error, but can also occur as a result of a diagnostic or treatment procedure in the absence of a medical error.[3]

So-called ‘trigger tools’ focus on patient harm, not errors, and can in combination with more traditional incident reporting in healthcare help departments and hospitals focus their improvement work to reduce the overall rate of patient harm.[4] The global trigger tool (GTT) is a retrospective method for detecting iatrogenic harm [5] and has been used as a benchmarking system and means for monitoring change over time. A trigger has been defined as data present in the patient record that can directly or indirectly, by providing a clue for further investigation, represent an adverse event that caused patient harm.[6,7] The GTT has become a widely used tool in patient safety work. However, the understanding of health care–associated harm in children is limited as compared to adults and only recently a comprehensive pediatric trigger tool has been developed.[8]

The National Health Service (NHS) Paediatric Trigger Tool (PTT) was made based on various trigger tools for use in adults with the support of clinicians in nine UK hospitals, and was meant to be useful for district general hospitals, acute teaching hospitals and specialist pediatric centers.[4] However, there is a need for determining utility of such instruments derived from adult care in different institutions and patient groups. The items comprising the PTT should be piloted in different settings in order to remove unnecessary or adult-oriented triggers and/or add more relevant triggers.[7]

Hence, we aimed to examine utility of the NHS PTT in a large Nordic department of pediatrics and if needed adjust the tool for use in our patients.

Our primary focus was to examine if or to which extent the PTT detected patient harm in medical and surgical patients in our department and compare these results with voluntary incidence reports. A secondary aim was to assess utility of the different triggers, including predictive value of individual triggers for identifying harm.

## METHODS

The study was approved as part of quality improvement activities by the institutional review board at Akershus University Hospital (AHUS)

### Setting

AHUS is located outside the Norwegian capital Oslo. The hospital is the single largest acute hospital in Norway and offers a full range of medical services except cardiac- and neurosurgery, as well as treatment of severe traumatic injuries. AHUS does not have a pediatric intensive care unit (PICU), but transfers children below the age of 3 years in need for intensive care to a nearby university hospital. Critically ill children between three and 18 years are treated in the intensive care unit (ICU) for adults in AHUS. The hospital introduced early warning scoring systems after this study. Routine GTT screening has been performed since 2007.

The Department of Pediatric and Adolescent Medicine is a 37-bed level II unit. Children and adolescents between zero and 18 years of age referred by general physicians for acute specialist care are examined in the children's emergency department (ED) and about 50% are admitted. Registration of patient harm in our unit is exclusively based on voluntary reporting through an electronic incidence reporting system called Extend Quality System (EQS).

### PTT screening

We did a manual review of unplanned patient visits to the children's ED using the NHS Paediatric Trigger Tool User guide.[4] For convenience, we included the visits that were documented for the purpose of evaluating the introduction of a pediatric early warning score in our department over a 3 month period.[9] These visits represented 95% of all contacts in the children's ED in the study months. Pediatric (medical), as well orthopedic, general surgical; and ear, nose and throat (ENT) patients below the age of 18 years were included and the results were recorded in Excel spreadsheets (Microsoft Excel 2008 for Mac (Redmond, WA, US)).

The PTT screening was performed by the primary investigator (ALS) who is a consultant pediatrician in the department. Because AHUS is the first hospital in Norway to screen for pediatric triggers, there are no courses or formal training in the

1  
2  
3 PTT available in Norway. Hence, to get a general idea about the concept of trigger  
4 tools, ALS attended a full-day course in the GTT organized by The Norwegian  
5 Knowledge Centre for the Health Services. In addition, she received instructions from  
6 the GTT team at AHUS based on their review methodology and PTT screening of 10  
7 patient records was performed in collaboration with a representative from the GTT  
8 team.  
9  
10

11  
12  
13 The PTT consists of 39 items described in Table 1. The patient records were reviewed  
14 in the following order: Diagnoses and treatment procedures, discharge summaries,  
15 medication charts, laboratory results, operation notes, nurse notes, physician notes and  
16 admission note. Because only half of the acute referrals result in an admission, our  
17 practice differs from most medical departments for adults where a larger proportion of  
18 acutely referred patients are being admitted. The PTT user guide dictates a minimum  
19 length of stay of 8 hours.[4] However, as we argue that our threshold for admitting  
20 patients from the children's ED is high with often only slight differences in disease  
21 severity and complexity between those who are admitted and those who are not, we  
22 included also acute outpatient visits in our screening. Further, we chose to register all  
23 patient contacts with the diagnoses hypo-/hyperkalemia and/or hypo-/hypernatremia  
24 as trigger positive regardless of the definitions used in the PTT user guide for these  
25 triggers (Table 1). Otherwise, we strictly followed the definitions and guidelines  
26 outlined in the user guide.  
27  
28  
29  
30  
31  
32  
33  
34  
35  
36

37  
38 The PTT uses an adapted version of the National Coordinating Council for  
39 Medication Error Reporting and Prevention (NCC MERP) 'Index for Categorizing  
40 Errors'. [10] The rationale for this is that the NHS focuses on adverse events that  
41 cause actual patient harm and not medical errors that have a potential for patient  
42 harm. Therefore, only the NCC MERP categories E through I are included:  
43 Temporary harm to the patient and required intervention (category E), temporary  
44 harm to the patient and required initial or prolonged hospitalization (category F),  
45 permanent patient harm (category G), intervention required to sustain life (category  
46 H), and patient death (category I).  
47  
48  
49  
50  
51  
52

53  
54 Harm identified through PTT screening was compared to harm identified through  
55 voluntary incidence reports in the department.  
56  
57

### 58 **Voluntary incidence reporting**

59  
60

1  
2  
3 ALS read and classified patient related incidents regarding pediatric (medical)  
4 patients reported in the EQS in March until May 2011. The rate of harm reported in  
5 incidence reports during these three months was low. Therefore all reports in an  
6 extended period of time, 2010-2012, were included. Patient harm identified in the  
7 incidence reports was classified from E through I for comparison to the findings from  
8 the PTT screening.  
9  
10  
11  
12

### 13 **Statistical analyses**

14  
15  
16 Data were analyzed using PASW<sup>®</sup> Statistics 18.0 software (SPSS Inc., Chicago, IL).  
17 Comparisons between groups were made using the Chi-square test for categorical  
18 variables and Mann-Whitney *U* test for continuous variables. P-values <0.05 were  
19 considered significant. Positive predictive value (PPV) with 95% confidence interval  
20 (CI) for triggers was calculated and we calculated number of harm events per 1000  
21 patient days and 100 patient contacts.  
22  
23  
24  
25  
26  
27  
28  
29  
30  
31  
32  
33  
34  
35  
36  
37  
38  
39  
40  
41  
42  
43  
44  
45  
46  
47  
48  
49  
50  
51  
52  
53  
54  
55  
56  
57  
58  
59  
60

## RESULTS

From March 15<sup>th</sup> until May 31<sup>st</sup> 2011 761 patient records, representing 2268 patient days were screened for triggers. Median age (IQR) in years was 3.5 (1.2-11.0) for all patients and 2.5 (1.0-8.0) for the trigger positive patients. Male to female ratio was 352:409 and 113:129 for all patients and the trigger positive patients, respectively.

We identified 48 incidents of harm, representing 21 harm events per 1000 patient days and 6 harm events per 100 consultations. The distribution of the 48 patients with identified harm according to status as admitted or outpatient, as well as their distribution across specialties are presented in Table 2. 60.4% of the harm events were in the pediatric (medical) patients, whereas 22.9% occurred in ENT-patients, 10.4% in orthopedic and 6.3% in general surgical patients.

Harm was detected in 5% of all pediatric contacts with a slightly higher rate of 7% in pediatric admissions. The incidence of harm in all contacts including surgical and ENT patients and in admissions only regardless of specialty was similar, 6.3% and 8.3%, respectively.

All, but two identified harm events were categorized as harm category F, 'Temporary harm to the patient and required initial or prolonged hospitalization'. Examples of harm were postoperative pericarditis, ileus after gastrostomy, candida stomatitis after treatment with antibiotics, infection in percutaneous endoscopic gastrostomy, bleeding following placement of nasogastric feeding tube (harm category E) and nosocomial infection (gastroenteritis, pneumonia) for the pediatric patients. In orthopedic patients osteomyelitis after pinning of Bennett's fracture was found and in general surgical patients hematoma after hernia operation (outpatient: harm category E) was found. In the ENT patients bleeding, infection and/or dehydration following adenotonsillectomy were recurring harms.

### Voluntary incidence reports

About two thirds of the incidents reported were minor incidents like delay in medication administration not leading to patient harm.

Patient harm as defined by the PTT user guide was found in 51/160 (30.9%) of the incidence reports 2010-2012. 37 harm events were classified as harm category E, 8

1  
2  
3 category F, 3 category G, 1 category H and 2 category I. This equals 51/5854 (total  
4 number of patients admitted acutely with medical diagnoses 2010-2012) = 0.9%. Only  
5 three of these incidents were reported in the PTT study months giving a voluntary  
6 reported harm rate of 3/584 (number of pediatric patients in the PTT screening) =  
7 0.5% in March-May 2011.  
8  
9

10  
11 Patient harm reported through the incidence reporting system included unexpected  
12 patient death; fall injury; pain and swelling from subcutaneous peripheral venous  
13 catheter; complications to procedure; anaphylactic drug reactions; and prolonged  
14 hospitalization due to errors in medication and fluid administration.  
15  
16  
17

### 18 19 20 **Triggers**

21  
22 We identified one or more out of 20 of the 39 NHS triggers in 242 (31.8%) of all  
23 patient contacts. In 71.5% of the trigger positive contacts only one trigger was found.  
24 The highest number of triggers found in a patient contact was 4. The mean rate of  
25 triggers per patient was 1.4.  
26  
27  
28

29  
30 The most frequently found trigger was readmission within 30 days. Common reasons  
31 for unplanned readmission were surgical site infection, recurrent (respiratory tract)  
32 infections, postoperative bleeding and seizures. We found the second most common  
33 trigger in our screening to be hypoxia, but no patient harm was associated with this  
34 specific trigger.  
35  
36  
37

38  
39 Of the 242 trigger positive contacts, 177 (73.1%) were admissions and 65 (26.9%)  
40 acute outpatient visits. Table 2 shows how trigger positive admissions and outpatient  
41 contacts were distributed across specialties.  
42  
43

44  
45 The PPV of one or more triggers for identifying harm was 19.8%. When calculations  
46 were made for admissions (n= 761) and outpatient care (n= 242) separately, PPV was  
47 23.2% and 10.8%, respectively (p=0.03). When we looked at the PPV of individual  
48 triggers, PPV varied from zero in the case of hypoxia, thrombocytopenia and  
49 electrolyte abnormalities to 100% in the case of surgical site infection and nosocomial  
50 pneumonia (Table 3).  
51  
52  
53

54  
55 Table 4 shows rate of trigger positive contacts, rate of harm and PPV of triggers  
56 across specialties.  
57  
58  
59  
60

## DISCUSSION

This is the first report about use of a PTT in a European unit. Despite the fact that only half of the NHS pediatric triggers were found in the patient records screened in this study, we identified a ten times higher harm rate using the PTT than what was reported in the department's voluntary incidence reports in the same period. Patient harm identified through incidence report analysis and PTT screening was different in number and character in our unit.

Our pediatric centre is the largest acute pediatric unit in Norway, but we do not have a PICU in our hospital. Therefore, we do not treat the most severely ill children, and we only rarely use potent anesthesia medications. This may be one of the reasons why half of the NHS triggers were not found in our review, reflecting that some diagnoses and interventions with a high incidence of complications are not present in the children and adolescents in our unit.

In the recently published Canadian Pediatric Adverse Events Study, the incidence, type and severity of harm among children admitted to academic pediatric centers were compared with those admitted to community hospitals in Canada.[8] In that study, significantly more patient records from academic pediatric centers (38.8%) than from community hospitals (21.6%) were trigger-positive.[8] We found triggers in 31.8% of our patients. The overall rate of harm in the Canadian study was 9.2% with significantly more harm in academic pediatric centers (11.2%) than in community hospitals (3.3%). We found a total rate of harm in admitted children of 8.3%. These results might reflect that, although being an academic teaching unit, our center probably has a patient population with disease severity and complexity somewhere in between the two compared unit levels in the Canadian study.

Kirkendall et al.[7] found 37 harm events per 100 patients and 76 harm events per 1000 patient-days, a significantly higher rate than in our patients. One of the reasons for this may be that the study was conducted in a large US tertiary centre where 32.5% of the patients went to the operating room during their hospital stay and 13.3% were admitted to an ICU during part of or whole stay.

We found a PPV of one or more triggers of 19.8% when both acute outpatient contacts and admissions were included and a higher PPV when only admissions were



1  
2  
3 analyzed. Lemon and Stockwell found a PPV of 34%.[6] One of the possible reasons  
4 for this difference is that Lemon and Stockwell only screened for 11 triggers while we  
5 identified 20 different triggers, of which some had an individual PPV of zero. Another  
6 important difference is that Lemon and Stockwell reported results from a 4-year  
7 period whereas we only screened for a three-month period, which limits  
8 generalizability.  
9

10  
11 Like Kirkendall et al.,[7] we found that some modules, in particular the laboratory  
12 module, contained adult-oriented triggers like high INR and diagnostic imaging for  
13 embolus that were not identified in our chart review. Removal of unnecessary triggers  
14 would reduce the overall number of triggers that reviewers must consider. Hypoxia,  
15 electrolyte abnormalities and thrombocytopenia had a PPV of zero and may not be  
16 worthwhile screening for in our patient population. However, bearing in mind the  
17 short study period of 3 months, further studies, ideally multicenter studies are needed  
18 before abolishment of some triggers.  
19

20  
21 To our knowledge, we are the first group to report the use of a PTT for unplanned  
22 outpatient visits. Some trigger tools exist for outpatient care,[12,13] however they are  
23 not suitable for children and adolescents. As harm was detected in 7/267 (2.6%) of  
24 acute outpatient visits, we believe that identification of these events is important in a  
25 unit like ours where the number of acute outpatient visits is substantial.  
26

27  
28 Regardless, there seems to be a higher PPV of triggers in surgical patients, but the rate  
29 of harm was comparable across medical and surgical patients (5-6%), excluding ENT  
30 patients with a 35% total harm rate.  
31

32  
33 Needless to say, the extent to which trigger tools detect harm as intended depends to a  
34 large extent on routines for documentation. Like Kirkendall et al.,[7] we noticed that  
35 frequently occurring complications like complications to peripheral venous catheters,  
36 e.g. phlebitis, subcutaneous edema, tissue necrosis and infection, are infrequently  
37 documented in the records of the patients in our unit. The same applies to the  
38 incidence reporting system that contains information about only a small fraction of  
39 these types of patient harm. Hence, certain types of patient harm that are frequently  
40 occurring and should be targeted by interventions are not detected in their full extent  
41 neither with the PTT nor through voluntary incidence reporting.  
42  
43  
44  
45  
46  
47  
48  
49  
50  
51  
52  
53  
54  
55  
56  
57  
58  
59  
60

### Limitations of the study

The PTT screening and incident report analyses were performed by only one investigator, and inter-rater agreement could not be assessed in this study. The judgment regarding whether harm was present and how severe was left to one person, with no one to validate the findings. To our knowledge, the PTT is not established in any Norwegian pediatric unit, and we did not succeed in finding a person with both time and experience to validate the findings. For the same reason, this was a relatively small single-center study and the study period was short. Some of the triggers that were not identified during the three study months could possibly have been detected if we screened for a longer period. The decision to also screen unplanned outpatient contacts as well as including all sodium and potassium levels out of range were deviations from the PTT user guide that could potentially bias our results. However, as the outpatient contacts and admissions are to a large extent reported separately, and as the sodium and potassium trigger did not predict harm in any of our patients, we believe that these factors did not influence the main conclusions of the study.

Generalizability of our results may be limited to settings with similar organization of specialist healthcare including referral practices. However, it is important that utility studies performed in various patient groups be published in order for clinicians to judge applicability of the results to their practice.

## CONCLUSION

Using the NHS Paediatric Trigger tool we found a rate of trigger positive contacts and a rate of harm comparable to an extensive Canadian review. The PTT made us able to detect more and different types of harm among our children and adolescents than what we detect by our routine system for reporting patient harm.

The presence of adult-oriented triggers, triggers that were not identified at all, as well as triggers with a low predictive value for harm, indicate a need for modification of trigger tools to the setting in which they are intended to be used. The NHS PTT, with certain modifications can, as a supplement to voluntary incidence reporting, be used to calculate the rate of harm and identify areas of care where most harm events are occurring. Hence, it may inform priorities for action and track improvements over time.

## ACKNOWLEDGEMENT

The authors wish to thank Gunnvor Flaa Marum in the AHUS GTT team for assisting in the PTT screening.

## CONTRIBUTOR STATEMENT

ALS was the lead author for this paper and involved in all stages including design of the research, acquisition of data, analysis and interpretation of the data and statistical analysis. BN contributed to the drafting of the manuscript, critical revision of the manuscript and supervision.

## FUNDING

None

## DATA SHARING STATEMENT

No additional data available

**REFERENCES**

1. Kohn LT, Corrigan J, Donaldson MS (2000) To err is human : building a safer health system. Washington, D.C.: National Academy Press. xxi, 287 p. p.
2. Leape LL, Woods DD, Hatlie MJ, Kizer KW, Schroeder SA, et al. Promoting patient safety by preventing medical error. JAMA 1998;280:1444-1447.
3. Layde PM, Cortes LM, Teret SP, Brasel KJ, Kuhn EM, et al. Patient safety efforts should focus on medical injuries. JAMA 2002;287:1993-1997.
4. NHS Institute for Innovation and Improvement (2010) The Paediatric Trigger Tool User Guide. Coventry: NHS Institute for Innovation and Improvement.
5. Griffin F RR (2009) IHI Global Trigger Tool for measuring adverse events. Cambridge, Massachusetts.
6. Lemon V, Stockwell DC. Automated detection of adverse events in children. *Pediatr Clin North Am* 2012;59:1269-1278.
7. Kirkendall ES, Kloppenborg E, Papp J, White D, Frese C, et al. Measuring adverse events and levels of harm in pediatric inpatients with the Global Trigger Tool. *Pediatrics* 2012;130:e1206-1214.
8. Matlow AG, Baker GR, Flintoft V, Cochrane D, Coffey M, et al. Adverse events among children in Canadian hospitals: the Canadian Paediatric Adverse Events Study. *CMAJ* 2012;184:E709-718.
9. Solevag AL, Eggen EH, Schroder J, Nakstad B. Use of a modified pediatric early warning score in a department of pediatric and adolescent medicine. *PLoS One* 2013;8:e72534.
10. National Coordinating Council for Medication Error Reporting and Prevention (NCC MERP) (1996, revised 2001) National Coordinating Council for Medication Error Reporting and Prevention (NCC MERP) Taxonomy of Medication Errors; Available at <http://www.NCCMERP.org>.
11. Griffin FA RR (2009) HI Global Trigger Tool for Measuring Adverse Events. Cambridge: Institute for Healthcare Improvement.
12. Gandhi TK, Seger AC, Overhage JM, Murray MD, Hope C, et al. Outpatient adverse drug events identified by screening electronic health records. *J Patient Saf* 2010;6:91-96.
13. Institute for Healthcare Improvement (2011) IHI Outpatient Adverse Event Trigger Tool. In: Improvement IfH, editor. Cambridge.

Table 1 The Paediatric Trigger Tool (PTT) items as depicted in the NHS PTT User Guide[4]

|                       | <b>Item</b>                                                              |
|-----------------------|--------------------------------------------------------------------------|
| <b>General care</b>   | PG1 Early warning score                                                  |
|                       | PG2 Tissue damage or pressure ulcer                                      |
|                       | PG3 Readmission within 30 days                                           |
|                       | PG4 Unplanned admission                                                  |
|                       | PG5 Abnormal cranial imaging                                             |
|                       | PG6 Respiratory or cardiac arrest / crash calls                          |
|                       | PG7 Diagnostic imaging for embolus / thrombus +/- confirmation           |
|                       | PG8 Complication of procedure or treatment                               |
|                       | PG9 Transfer to higher level of care                                     |
|                       | PG10 Hypoxia O2 sat <85%                                                 |
|                       | PG11 Cancelled elective procedure / delayed discharge                    |
| <b>Surgical care</b>  | PS1 Return to theatre                                                    |
|                       | PS2 Change in planned procedure                                          |
|                       | PS3 Surgical site infection or hospital acquired urinary tract infection |
|                       | PS4 Removal/injury/repair of organ                                       |
| <b>Intensive care</b> | IP1 Readmission to Intensive Care or High Dependency Care                |
| <b>Medication</b>     | PM1 Vitamin K (except for routine dose in neonates)                      |
|                       | PM2 Naloxone                                                             |
|                       | PM3 Flumazenil (Romazicon)                                               |
|                       | PM4 Glucagon or glucose $\geq 10\%$                                      |
|                       | PM5 Chlorphenamine or antihistamine                                      |
|                       | PM6 Anti-emetics                                                         |
|                       | PM7 IV Bolus $\geq 10\text{ml/kg}$ colloid or crystalloid given          |
|                       | PM8 Abrupt medication stop                                               |
| <b>Lab test</b>       | PL15 Thrombocytopenia (platelets <100)                                   |
|                       | PL1 High INR >5 or aPTT >100                                             |
|                       | PL2 Transfusion                                                          |
|                       | PL3 Abrupt drop in Hb or Hct (>25%)                                      |
| <b>Biochemistry</b>   | PL4 Rising urea or creatinine (>2x baseline)                             |
|                       | PL5/PL6 Electrolyte abnormalities (Na+ <130 or >150, K+ <3.0 or >6.0)    |
|                       | PL7 Hypoglycemia (<3mmol/l)                                              |
|                       | PL8 Hyperglycemia (>12mmol/l)                                            |
|                       | PL9 Drug level out of range                                              |
| <b>Microbiology</b>   | PL10 MRSA bacteraemia                                                    |
|                       | PL11 C. difficile                                                        |
|                       | PL12 Vanc resistant enterococcus (VRE)                                   |
|                       | PL13 Nosocomial pneumonia                                                |
|                       | PL14 Positive blood culture                                              |
| <b>Other</b>          | PO1 Other event                                                          |

Table 2 Distribution of trigger positive admissions and outpatient contacts across specialties

|                        | Pediatric |            | Ortopedic |            | General surgical |            | Ear, nose and throat |            |
|------------------------|-----------|------------|-----------|------------|------------------|------------|----------------------|------------|
|                        | Admitted  | Outpatient | Admitted  | Outpatient | Admitted         | Outpatient | Admitted             | Outpatient |
| Total n (%)            | 356 (47)  | 228 (30)   | 70 (9)    | 13 (2)     | 41 (5)           | 22 (3)     | 27 (3.5)             | 4 (0.5)    |
| Trigger positive n (%) | 148 (61)  | 59 (24.5)  | 8 (3.5)   | 3 (1)      | 10 (4)           | 2 (1)      | 11 (4.5)             | 1 (0.5)    |
| Harm n                 | 26        | 3          | 3         | 2          | 1                | 2          | 11                   | 0          |

Table 3 The triggers we identified in our study are presented with positive predictive value (PPV) with 95% confidence interval (CI) for identifying harm. The numerator represents number of harm events and the denominator how many times each individual trigger was found in all patient contacts (n=761)

|                       | <b>Item</b>                                                              | <b>PPV (CI)%</b> |
|-----------------------|--------------------------------------------------------------------------|------------------|
| <b>General care</b>   | PG1 Early warning score                                                  |                  |
|                       | PG2 Tissue damage or pressure ulcer                                      |                  |
|                       | PG3 Readmission within 30 days                                           | 24/175=14 (9-20) |
|                       | PG4 Unplanned admission                                                  |                  |
|                       | PG5 Abnormal cranial imaging                                             |                  |
|                       | PG6 Respiratory or cardiac arrest / crash calls                          | 0/1=0 (0-95)     |
|                       | PG7 Diagnostic imaging for embolus / thrombus +/- confirmation           | 1/2=50 (3-97)    |
|                       | PG8 Complication of procedure or treatment                               | 17/23=74 (51-89) |
|                       | PG9 Transfer to higher level of care                                     | 3/22=14 (4-36)   |
|                       | PG10 Hypoxia O2 sat <85%                                                 | 0/25=0 (0-17)    |
|                       | PG11 Cancelled elective procedure / delayed discharge                    | 1/1=100 (5-100)  |
| <b>Surgical care</b>  | PS1 Return to theatre                                                    | 1/1=100 (5-100)  |
|                       | PS2 Change in planned procedure                                          |                  |
|                       | PS3 Surgical site infection or hospital acquired urinary tract infection | 6/6=100 (52-100) |
|                       | PS4 Removal/injury/repair of organ                                       |                  |
| <b>Intensive care</b> | IP1 Readmission to Intensive Care or High Dependency Care                |                  |
| <b>Medication</b>     | PM1 Vitamin K (except for routine dose in neonates)                      |                  |
|                       | PM2 Naloxone                                                             |                  |
|                       | PM3 Flumazenil (Romazicon)                                               |                  |
|                       | PM4 Glucagon or glucose $\geq 10\%$                                      |                  |
|                       | PM5 Chlorphenamine or antihistamine                                      | 0/1=0 (0-95)     |
|                       | PM6 Anti-emetics                                                         |                  |
|                       | PM7 IV Bolus $\geq 10\text{ml/kg}$ colloid or crystalloid given          | 3/19=16 (4-40)   |
|                       | PM8 Abrupt medication stop                                               |                  |
| <b>Lab test</b>       | PL15 Thrombocytopenia (platelets <100)                                   | 0/7=0 (0-44)     |
|                       | PL1 High INR >5 or aPTT >100                                             |                  |
|                       | PL2 Transfusion                                                          | 2/8=25 (4-64)    |
|                       | PL3 Abrupt drop in Hb or Hct (>25%)                                      | 2/8=25 (4-64)    |
| <b>Biochemistry</b>   | PL4 Rising urea or creatinine (>2x baseline)                             | 0/1=0 (0-95)     |
|                       | PL5/PL6 Electrolyte abnormalities (Na+ <130 or >150, K+ <3.0 or >6.0)    | 0/12=0 (0-30)    |
|                       | PL7 Hypoglycemia (<3mmol/l)                                              | 3/8=38 (10-74)   |
|                       | PL8 Hyperglycemia (>12mmol/l)                                            | 0/1=0 (0-95)     |
|                       | PL9 Drug level out of range                                              |                  |
| <b>Microbiology</b>   | PL10 MRSA bacteraemia                                                    |                  |
|                       | PL11 C. difficile                                                        |                  |
|                       | PL12 Vanc resistant enterococcus (VRE)                                   |                  |
|                       | PL13 Nosocomial pneumonia                                                | 2/2=100 (20-100) |
|                       | PL14 Positive blood culture                                              | 1/1=100 (5-100)  |
| <b>Other</b>          | PO1 Other event                                                          |                  |

Table 4 Rate of trigger positive contacts, rate of harm and positive predictive value (PPV) of positive triggers across specialties

| Specialty            | Rate of trigger positive contacts | Rate of harm  | PPV   |
|----------------------|-----------------------------------|---------------|-------|
| Pediatric            | 207/584 (35.4%)                   | 29/584 (5.0%) | 14%   |
| Orthopedic surgery   | 11/83 (13.3%)                     | 5/83 (6.0%)   | 45.5% |
| General surgery      | 12/63 (19.0%)                     | 3/63 (4.8%)   | 25%   |
| Ear, Nose and Throat | 12/31 (38.7%)                     | 11/31 (35.5%) | 91.7% |
| Total                | 242/761 (31.8%)                   | 48/761 (6.3%) | 19.8% |



1  
2  
3  
4  
5  
6  
7  
8  
9  
10  
11  
12  
13  
14  
15  
16  
17  
18  
19  
20  
21  
22  
23  
24  
25  
26  
27  
28  
29  
30  
31  
32  
33  
34  
35  
36  
37  
38  
39  
40  
41  
42  
43  
44  
45  
46  
47  
48  
49  
50  
51  
52  
53  
54  
55  
56  
57  
58  
59  
60

Title: Utility of a Pediatric Trigger Tool in a Norwegian Department of Pediatric and Adolescent Medicine

Formatted: Font: Times New Roman

Authors:

Anne Lee Solevåg<sup>1,2</sup>

Britt Nakstad<sup>1,2</sup>

<sup>1</sup>The Department of Pediatric and Adolescent Medicine, Akershus University Hospital, 1478 Lørenskog, Norway

<sup>2</sup>Institute of Clinical Medicine, University of Oslo, Oslo, Norway

Corresponding author:

Anne Lee Solevåg (MD, PhD), The Department of Pediatric and Adolescent Medicine, Akershus University Hospital, 1478 Lørenskog, Norway

Tlph: +47 ~~02900~~67964520/+47 41469314, Fax: +47 67960900, ~~E-mail:~~  
[a.l.solevag@medisin.uio.no](mailto:a.l.solevag@medisin.uio.no)

[E-mail: a.l.solevag@medisin.uio.no](mailto:a.l.solevag@medisin.uio.no)

Keywords: Paediatrics. Quality in health care

Word count of abstract: 263299

Word count:

33822997

## ABSTRACT

### **Background**

~~Trigger Tool Systems are retrospective methods that measure iatrogenic harm and have been used to identify areas of improvement and for monitoring change over time.~~

### **Objectives**

The British National Health Service (NHS) Paediatric Trigger Tool (PTT) was made based on various trigger tools developed for use in adults. ~~We aimed to investigate utility of the NHS PTT in children and adolescents in our unit. The PTT has not previously been developed or used in Nordic units. We aimed to compare harm identified through PTT screening with voluntary incidence reports in our department. A secondary aim was to assess utility of the different triggers, including predictive value for identifying harm. We hypothesized that the NHS PTT would need adjustments for the setting in which it is used.~~

### **Methods**

#### **Setting**

A Norwegian level II department of pediatric and adolescent medicine.

#### **Participants**

~~A convenience sample of 761 acute medical and surgical patient contacts representing 2268 patient days in March-May 2011 were screened for triggers using the NHS PTT of 39 items. Both medical and surgical patients were included. Median age (IQR) for the trigger positive patients was 2.5 (1.0-8.0) years; range 0-18 years.~~

Formatted: Widow/Orphan control, Adjust space between Latin and Asian text, Adjust space between Asian text and numbers

### Primary and secondary outcome measures

The type and rate of identified harm ~~detected~~ were compared to the department's voluntary incidence reports. The type and rate of identified triggers and positive predictive value for harm.

Formatted: Font color: Black

### Results

Median age (IQR) for the trigger positive patients was 2.5 (1.0-8.0) years; range 0-18 years.

Formatted: Font: Not Bold, Font color: Black

Formatted: None, Widow/Orphan control, Adjust space between Latin and Asian text, Adjust space between Asian text and numbers

The PTT revealed a harm rate of 5% for medical patients, as compared to 0.5% in the incidence reports the same months. PTT screening revealed other types of harm than those reported by health care personnel themselves. We ~~found~~ identified only 20 out of the 39 NHS PTT triggers in 242 of the contacts (=31.8%). The highest number of triggers in a patient contact was 4. The most frequent trigger was re-admission within 30 days. ~~The~~ Hypoxia, which was the second most ~~common~~ frequent trigger, ~~hypoxia~~, had a predictive value for detecting ~~did not predict any~~ patient harm ~~of zero~~.

Formatted: Level 1

Formatted: Font color: Auto

Formatted: Font color: Auto

Formatted: Font color: Auto

For the medical patients, the PTT revealed a harm rate of 5%, as compared to 1.7% in the incidence reports for the same months. The types of harm detected through PTT screening differed from patient harm that health care personnel chose to report themselves.

### Conclusion

This study showed that the NHS PTT, ~~with certain modifications to our context, could, as a supplement to~~ identifies more and other types of harm than voluntary incidence ~~reporting, be used to calculate the rate of harm and identify areas of care where most harm events are occurring~~ reports. The presence of adult-oriented triggers, triggers that were not identified at all, as well as triggers with a low predictive value for harm may indicate the need for modification of the PTT to different settings. More studies are needed before a final decision is made to exclude triggers from the screening.

Formatted: No widow/orphan control, Don't adjust space between Latin and Asian text, Don't adjust space between Asian text and numbers

Formatted: Font color: Black

### ARTICLE SUMMARY

### Strengths and limitations of this study

- There is a limited understanding of how structured patient safety work in pediatrics can be performed
- We investigated utility of The British National Health Service Paediatric Trigger Tool (PTT) in a level II pediatric unit and found that the tool should probably be modified to different settings
- Previous to this study, only one major pediatric trigger tool has been published in peer review journal format and none have been applied in outpatient settings
- This review is based on a significant amount of patient data. However, the single-center character and the short study period call for additional studies, preferentially multicenter studies

### **INTRODUCTION**

~~So called 'trigger tools' in combination with more traditional incident reporting in healthcare can help departments and hospitals focus their improvement work to reduce the overall rate of patient harm. By identifying recurring medical errors focused efforts can be made to improve patient safety. [1,2] The Global trigger tool (GTT) is a retrospective method for detecting harm caused by healthcare, i.e. iatrogenic harm~~

Formatted: Font color: Auto

Field Code Changed

1  
2  
3  
4  
5  
6 However, medical errors do not always lead to harm to the patient. Patient harm can  
7 be caused by medical error, but can also occur as a result of a diagnostic or treatment  
8 procedure in the absence of a medical error.[2]3] and has been used as a  
9 benchmarking system and means for monitoring change over time. A 'trigger' is not  
10 the harm itself, but may lead the attention to patients who have experienced iatrogenic  
11 harm that can be identified by a more thorough chart review. A trigger has been  
12 defined as data present in the patient record that can directly or indirectly, by  
13 providing a clue for further investigation of the chart, represent an adverse event that  
14 caused patient harm.

Formatted: Font color: Black

Field Code Changed

15  
16  
17  
18  
19  
20  
21 So-called 'trigger tools' focus on patient harm, not errors, and can in combination  
22 with more traditional incident reporting in healthcare help departments and hospitals  
23 focus their improvement work to reduce the overall rate of patient harm.[3,4]

Formatted: Font color: Black

Field Code Changed

24  
25  
26 The Norwegian three-year patient safety campaign, "In Safe Hands", was launched in  
27 January 2011 by the Norwegian Ministry of Health. The global trigger tool (GTT) is a  
28 retrospective method for detecting iatrogenic harm [5] with the aim to reduce patient  
29 harm. One of the important efforts of the campaign is to establish the GTT in  
30 Norwegian hospitals. The administrators of the patient safety campaign acknowledge  
31 that they found it difficult to embrace all fields of medicine in their efforts, and  
32 children were one of the groups they would not include in their campaign.

Field Code Changed

33  
34  
35  
36 The Norwegian patient safety campaign reflects the fact that there is a limited and  
37 has been used as a benchmarking system and means for monitoring change over time.

Formatted: Level 1

38  
39 A trigger has been defined as data present in the patient record that can directly or  
40 indirectly, by providing a clue for further investigation, represent an adverse event  
41 that caused patient harm.[6,7] The GTT has become a widely used tool in patient  
42 safety work. However, the understanding of health care-associated harm in children is  
43 limited as compared to adults and only recently; a comprehensive pediatric trigger  
44 tool has been developed.[6]8]

45  
46  
47  
48  
49 The National Health Service (NHS) Paediatric Trigger Tool (PTT) was made based  
50 on various trigger tools for use in adults with the support of clinicians in nine UK  
51 hospitals, and was meant to be useful for district general hospitals, acute teaching  
52 hospitals and specialist pediatric centers.[14] However, there is a need for  
53 determining utility of such instruments derived from adult care in different institutions  
54  
55  
56  
57  
58  
59  
60

Formatted: Left, Level 1

1  
2  
3  
4  
5  
6 and ~~contexts-patient groups~~. The items comprising the PTT should be piloted in  
7 different settings in order to remove unnecessary or adult-oriented triggers and/or add  
8 more relevant triggers.<sup>[47]</sup>  
9

10  
11 Hence, we aimed to examine utility of the NHS PTT in ~~the context of~~ a large Nordic  
12 department of pediatrics and if needed adjust the tool for use in our patients.  
13

14  
15 Our primary focus was to examine ~~the extent if or~~ to which extent the PTT detected  
16 patient harm in medical and surgical patients in our department. and compare these  
17 results with voluntary incidence reports. A secondary aim was to assess utility of the  
18 different triggers, including predictive value of individual triggers for identifying  
19 harm.  
20  
21  
22  
23  
24  
25  
26  
27  
28  
29  
30  
31  
32  
33  
34  
35  
36  
37  
38  
39  
40  
41  
42  
43  
44  
45  
46  
47  
48  
49  
50  
51  
52  
53  
54  
55  
56  
57  
58  
59  
60

## METHODS

The study was approved as part of quality improvement activities by the hospital's institutional review board.

### Context

at Akershus University Hospital (AHUS)

### Setting

AHUS is located outside the Norwegian capital Oslo. The hospital is the single largest acute hospital in Norway, but does not treat severe traumatic injuries and does not perform offers a full range of medical services except cardiac- or and neurosurgery, as well as treatment of severe traumatic injuries. AHUS does not have a pediatric intensive care unit (PICU), but transfers children below the age of 3 years in need for intensive care to a nearby university hospital. Critically ill children between three and 18 years are treated in the intensive care unit (ICU) for adults in AHUS. The hospital did not at the time of this study routinely use introduced early warning scoring systems and does not have a so-called rapid response team.

All patient documentation including laboratory results and medications has since October 2011 been stored in electronic patient records. AHUS has adopted the GTT and has performed routine GTT screening since 2008 after this study. Routine GTT screening has been performed since 2007.

The Department of Pediatric and Adolescent Medicine is a 37-bed unit (excluding the neonatal intensive care unit (NICU)) with 112,000 patients from 0-18 years of age in its catchment area level II unit. Children and adolescents between zero and 18 years of age referred by general physicians for acute specialist care are being examined in

Formatted: Font: Bold

Formatted: Left, Level 1

Formatted: Font color: Gray-85%

Formatted: Font color: Gray-85%

the children's emergency department (ED) and about 50% of them are judged to need hospital admission. The remaining 50% are being registered as 'acute outpatient contacts', defined as requiring hospital stay, usually in the children's ED, of less than five hours.

Formatted: Font color: Gray-85%

Formatted: Font color: Gray-85%

Due to its geographical closeness to large tertiary centers at Oslo University Hospital (OUS), AHUS does not have a Pediatric Intensive Care Unit (PICU), but transfers children below the age of three years in need for intensive care to OUS. Critically ill children between three and 18 years are treated in the intensive care unit (ICU) for adults in AHUS.

admitted. Registration of patient harm in our unit is exclusively based on voluntary reporting through an electronic incidence reporting system called Extend Quality System (EQS).

Formatted: Tab stops: 2.46", Left

#### PTT screening

~~From March 15<sup>th</sup> until Mai 31<sup>st</sup> 2011-761 We did a manual review of unplanned patient records, representing 2268 patient days and 95% of all acute referrals in this period were screened for triggers visits to the children's ED using the NHS Paediatric Trigger Tool User guide.[14] Pediatric (medical), as well orthopedic general surgical; and ear, nose and throat (ENT) patients below the age of 18 years were included. Data from these patients in relation to the~~ For convenience, we included the visits that were documented for the purpose of evaluating the introduction of a pediatric early warning score in our department ~~is reported elsewhere over a 3 month period.[79]~~ These visits represented 95% of all contacts in the children's ED in the study months. Pediatric (medical), as well orthopedic, general surgical; and ear, nose and throat (ENT) patients below the age of 18 years were included and the results were recorded in Excel spreadsheets (Microsoft Excel 2008 for Mac (Redmond, WA, US)).

Formatted: Font color: Gray-85%

Formatted: Font color: Gray-85%

Formatted: Font color: Gray-85%

Formatted: Font color: Gray-85%

The PTT screening was performed by the primary investigator, ~~(ALS)~~ who is a consultant pediatrician in the department. Because AHUS is the first hospital in Norway to screen for pediatric triggers, there ~~is are~~ no courses or formal training in the PTT available in Norway. Hence, to get a general idea about the concept of trigger tools, ALS attended a full-day course in the GTT organized by The Norwegian Knowledge Centre for the Health Services. In addition, she received instructions from

Formatted: No widow/orphan control, Don't adjust space between Latin and Asian text, Don't adjust space between Asian text and numbers



the GTT team at AHUS based on their review methodology and PTT screening of 10 patient records was performed ~~by in collaboration with~~ a representative from the GTT team ~~to assess inter-rater agreement.~~

The PTT consists of 39 items described in Table 1. ~~The General Care, Laboratory Test and Medication components (triggers) should always be looked for. The other components should only be used if applicable. The patient records were reviewed in the following order: Diagnoses and treatment procedures, discharge summaries, medication charts, laboratory results, operation notes, nurse notes, physician notes and admission note. Because only half of the acute referrals result in an admission, our practice differs from most medical departments for adults where a larger proportion of acutely referred patients are being admitted. The PTT user guide dictates a minimum length of stay of 8 hours.~~ However, as we argue that our study all 39 triggers were looked ~~threshold~~ for:

Formatted: Font color: Auto

Formatted: Font color: Auto

Formatted: Font color: Auto

Formatted: Font color: Auto

~~Table 1 The Paediatric Trigger Tool (PTT) items as depicted in admitting patients from the NHS PTT User Guide~~ children's ED is high with often only slight differences in disease severity and complexity between those who are admitted and those who are not, we included also acute outpatient visits in our comments to some of the items. PICU = Pediatric intensive care unit, PPV = Positive predictive value

Formatted: Font: 12 pt

Formatted: Font: 12 pt

Formatted: Font: 12 pt

|              | Item                                | Our comment                                                                                                                                        | PPV          |
|--------------|-------------------------------------|----------------------------------------------------------------------------------------------------------------------------------------------------|--------------|
| General care | PG1-Early warning score             | An early warning score system was not implemented as a routine assessment tool at the time of our PTT study                                        |              |
|              | PG2-Tissue damage or pressure ulcer | Tissue damage associated with peripheral venous catheters does occur in our unit. However, they are infrequently documented in the patient records |              |
|              | PG3-Readmission within 30           | We included contacts that were a readmission within 30                                                                                             | 24/175=13.7% |

1  
2  
3  
4  
5  
6  
7  
8  
9  
10  
11  
12  
13  
14  
15  
16  
17  
18  
19  
20  
21  
22  
23  
24  
25  
26  
27  
28  
29  
30  
31  
32  
33  
34  
35  
36  
37  
38  
39  
40  
41  
42  
43  
44  
45  
46  
47  
48  
49  
50  
51  
52  
53  
54  
55  
56  
57  
58  
59  
60

|                |                                                                          |                                                                                                                                                       |             |
|----------------|--------------------------------------------------------------------------|-------------------------------------------------------------------------------------------------------------------------------------------------------|-------------|
|                | days                                                                     | days or were followed by a readmission within 30 days                                                                                                 |             |
|                | PG4 Unplanned admission                                                  | Nearly all admissions are unplanned in our unit                                                                                                       |             |
|                | PG5 Abnormal cranial imaging                                             | We do not have a PICU (patients do not experience severe hypotension etc.) Congenital anomalies on cranial imaging should not be considered a trigger |             |
|                | PG6 Respiratory or cardiac arrest / crash calls                          |                                                                                                                                                       | 0/1=0%      |
|                | PG7 Diagnostic imaging for embolus / thrombus +/- confirmation           | Rarely applicable in our unit due to no PICU                                                                                                          | 1/2=50%     |
|                | PG8 Complication of procedure or treatment                               |                                                                                                                                                       | 17/23=73.9% |
|                | PG9 Transfer to higher level of care (including specialist unit/ICU/HDU) | In our unit this often means transfer to another hospital as we do not have a PICU                                                                    | 3/22=13.6%  |
|                | PG10 Hypoxia O2 sat <85%                                                 | We chose to redefine this item to "received supplementary oxygen"                                                                                     | 0/25=0%     |
|                | PG11 Cancelled elective procedure / delayed discharge                    |                                                                                                                                                       | 1/1=100%    |
| Surgical care  | PS1 Return to theatre                                                    |                                                                                                                                                       | 1/1=100%    |
|                | PS2 Change in planned procedure                                          |                                                                                                                                                       |             |
|                | PS3 Surgical site infection or hospital acquired urinary tract infection |                                                                                                                                                       | 6/6=100%    |
|                | PS4 Removal/injury/repair of organ                                       |                                                                                                                                                       |             |
| Intensive care | IPI Readmission to Intensive Care or High Dependency Care                |                                                                                                                                                       |             |
| Medication     | PM1 Vitamin K (except for routine dose in neonates)                      |                                                                                                                                                       |             |
|                | PM2 Naloxone                                                             |                                                                                                                                                       |             |
|                | PM3 Flumazenil (Romazicon)                                               |                                                                                                                                                       |             |
|                | PM4 Glucagon or glucose $\geq$ 10%                                       |                                                                                                                                                       |             |
|                | PM5 Chlorphenamine or antihistamine                                      |                                                                                                                                                       | 0/1=0%      |
|                | PM6 Anti-emetics                                                         |                                                                                                                                                       |             |
|                | PM7 IV Bolus $\geq$ 10ml/kg colloid or crystalloid given                 |                                                                                                                                                       | 3/19=15.8%  |
|                | PM8 Abrupt medication stop                                               |                                                                                                                                                       |             |
| Lab test       | PL15 Thrombocytopenia (platelets <100)                                   |                                                                                                                                                       | 0/7=0%      |
|                | PL1 High INR >5 or aPTT >100                                             |                                                                                                                                                       |             |
|                | PL2 Transfusion                                                          |                                                                                                                                                       | 2/8=25%     |
|                | PL3 Abrupt drop in Hb or Hct (>25%)                                      |                                                                                                                                                       | 2/8=25%     |
| Biochemistry   | PL4 Rising urea or creatinine (>2x baseline)                             |                                                                                                                                                       | 0/1=0%      |
|                | PL5/PL6 Electrolyte abnormalities (Na+ <130 or >150, K+ <3.0 or >6.0)    | We registered all Na- and K- abnormalities as diagnosis, regardless of the limits proposed by the NHS.                                                | 0/12=0%     |
|                | PL7 Hypoglycemia (<3mmol/l)                                              |                                                                                                                                                       | 3/8=37.5%   |
|                | PL8 Hyperglycemia (>12mmol/l)                                            |                                                                                                                                                       | 0/1=0%      |
|                | PL9 Drug level out of range                                              |                                                                                                                                                       |             |
| Microbiology   | PL10 MRSA bacteraemia                                                    | Very rare in Norway                                                                                                                                   |             |
|                | PL11 C. difficile                                                        | Rare in our unit                                                                                                                                      |             |
|                | PL12 Vane resistant enterococcus (VRE)                                   | Very rare in Norway                                                                                                                                   |             |
|                | PL13 Nosocomial pneumonia                                                |                                                                                                                                                       | 2/2=100%    |
|                | PL14 Positive blood culture                                              |                                                                                                                                                       | 1/1=100%    |
| Other          | PO1 Other event                                                          |                                                                                                                                                       |             |

Because about half of the acutely referred children are treated as outpatients in our pediatric ED, our practice differs from medical departments for adults where a larger proportion of acutely referred patients are being admitted. Therefore, we chose to

~~screen acute outpatient contacts for triggers even though the PTT user guide dictates a minimum length of stay of 8 hours.[1]~~

screening. Further, we chose to register all patient contacts with the diagnoses hypo-/hyperkalemia and/or hypo-/hypernatremia as trigger positive regardless of the definitions used in the PTT user guide for these triggers (Table 1). Otherwise, we strictly followed the definitions and guidelines outlined in the user guide.

The PTT uses an adapted version of the National Coordinating Council for Medication Error Reporting and Prevention (NCC MERP) 'Index for Categorizing Errors'.<sup>[8][10]</sup>:

~~The rationale for this is that the NHS focuses on adverse events that cause actual patient harm and not medical errors that have a potential for patient harm. Therefore, only the NCC MERP categories E through I are included.~~ Temporary harm to the patient and required intervention

~~F-Temporary (category E), temporary~~ harm to the patient and required initial or prolonged hospitalization

~~(category F), permanent patient harm (category G-Permanent patient harm H-Intervention), intervention~~ required to sustain life

~~I-Patient (category H), and patient~~ death (category I).

~~PTT screening results with regards to identified triggers and harm were compared to GTT screening results from AHUS.~~ Harm identified through PTT screening was ~~also~~ compared to harm identified through voluntary incidence reports in the department.

### Voluntary incidence reporting

ALS read and classified patient related incidents regarding pediatric (medical) patients reported in the EQS in March until May 2011. The rate of harm reported in incidence reports during these three months was low, ~~and~~ Therefore all reports in an extended period of time, ~~i.e. 2010, 2011 and 2012,~~ were included ~~for comparison to the PTT results.~~ Patient harm identified in the incidence reports was classified from E through I for comparison to the findings from the PTT screening.

Formatted: No widow/orphan control, Don't adjust space between Latin and Asian text, Don't adjust space between Asian text and numbers

Formatted: Font color: Auto

Formatted: Widow/Orphan control, Adjust space between Latin and Asian text, Adjust space between Asian text and numbers, Tab stops: Not at 0.39" + 0.78" + 1.17" + 1.56" + 1.94" + 2.33" +

### Statistical analyses

Data were analyzed using PASW<sup>®</sup> Statistics 18.0 software (SPSS Inc., Chicago, IL). Comparisons between groups were made using the Chi-square test for categorical variables and Mann-Whitney *U* test for continuous variables. P-values <0.05 were considered significant. Positive predictive value (PPV) with 95% confidence interval (CI) for triggers was calculated and we calculated number of harm events per 1000 patient days and 100 patient contacts.

Formatted: None

## RESULTS

### **PTT screening**

#### ***General***

From March 15<sup>th</sup> until Mai 31<sup>st</sup> 2011 761 patient records, representing 2268 patient days were screened for triggers. Median age (IQR) in years was 3<sub>2</sub>.5 (1<sub>2</sub>.2-11<sub>2</sub>.0) for all patients and 2<sub>2</sub>.5 (1<sub>2</sub>.0-8<sub>2</sub>.0) for the trigger positive patients. Male to female ratio was 352:409 and 113:129 for all patients and the trigger positive patients, respectively.

Figure 1 shows the distribution of contacts between the different specialties for admissions and outpatient visits, respectively. We identified 48 incidents of harm, representing 21 harm events per 1000 patient days and 6 harm events per 100 consultations. The distribution of the 48 patients with identified harm according to status as admitted or outpatient, as well as their distribution across specialties are presented in Table 2. 60.4% of the harm events were in the pediatric (medical) patients, whereas 22.9% occurred in ENT-patients, 10.4% in orthopedic and 6.3% in general surgical patients.

Harm was detected in 5% of all pediatric contacts with a slightly higher rate of 7% in pediatric admissions. The incidence of harm in all contacts including surgical and ENT patients and in admissions only regardless of specialty was similar, 6.3% and 8.3%, respectively.

All, but two identified harm events were categorized as harm category F, 'Temporary harm to the patient and required initial or prolonged hospitalization'. Examples of harm were postoperative pericarditis, ileus after gastrostomy, candida stomatitis after treatment with antibiotics, infection in percutaneous endoscopic gastrostomy, bleeding following placement of nasogastric feeding tube (harm category E) and nosocomial infection (gastroenteritis, pneumonia) for the pediatric patients. In orthopedic patients osteomyelitis after pinning of Bennett's fracture was found and in general surgical patients hematoma after hernia operation (outpatient: harm category

E) was found. In the ENT patients bleeding, infection and/or dehydration following adenotonsillectomy were recurring harms.

### **Voluntary incidence reports**

About two thirds of the incidents reported were minor incidents like delay in medication administration not leading to patient harm.

Patient harm as defined by the PTT user guide was found in 51/160 (30.9%) of the incidence reports 2010-2012. 37 harm events were classified as harm category E, 8 category F, 3 category G, 1 category H and 2 category I. This equals 51/5854 (total number of patients admitted acutely with medical diagnoses 2010-2012) = 0.9%. Only three of these incidents were reported in the PTT study months giving a voluntary reported harm rate of 3/584 (number of pediatric patients in the PTT screening) = 0.5% in March-May 2011.

Patient harm reported through the incidence reporting system included unexpected patient death; fall injury; pain and swelling from subcutaneous peripheral venous catheter; complications to procedure; anaphylactic drug reactions; and prolonged hospitalization due to errors in medication and fluid administration.

### **Triggers**

We identified ~~20-one or more~~ out of ~~20 of~~ the 39 ~~different~~ NHS triggers in 242 (31.8%) of ~~the-all~~ patient contacts. In 71.5% of the trigger positive contacts only one trigger was found. The highest number of triggers found in a patient contact was 4 (~~3 contacts = 1.2%~~). The mean rate of triggers per patient was 1.4.

The most frequently found trigger was re-admission within 30 days. ~~52.5% of outpatient visits were a re-admission or were followed by a readmission within 30 days and 42.8% of admissions were or were followed by a readmission within 30 days.~~ Common reasons for unplanned readmission were surgical site infection, recurrent (respiratory tract) infections, postoperative bleeding and seizures. ~~The-We found the~~ second most common trigger in our screening ~~was-to be~~ hypoxia, ~~but no patient harm was associated with this specific trigger.~~

Of the 242 trigger positive contacts, 177 (73.1%) were admissions and 65 (26.9%) acute outpatient visits. ~~FigureTable~~ 2 shows how trigger positive admissions and

Formatted: Widow/Orphan control, Adjust space between Latin and Asian text, Adjust space between Asian text and numbers

Formatted: Font color: Black

Formatted: Font: Not Italic, Font color: Black

Formatted: None, Widow/Orphan control, Adjust space between Latin and Asian text, Adjust space between Asian text and numbers

outpatient contacts were distributed across specialties.

Formatted: Font color: Black

**Table 2 Rate of trigger positive contacts, rate of harm and positive predictive value (PPV) across specialties**

| Specialty            | Rate of trigger positive contacts | Rate of harm  | PPV   |
|----------------------|-----------------------------------|---------------|-------|
| Pediatric            | 207/584 (35.4%)                   | 29/584 (5.0%) | 14%   |
| Orthopedic surgery   | 11/83 (13.3%)                     | 5/83 (6.0%)   | 45.5% |
| General surgery      | 12/63 (19.0%)                     | 3/63 (4.8%)   | 25%   |
| Ear, Nose and Throat | 12/31 (38.7%)                     | 11/31 (35.5%) | 91.7% |
| Total                | 242/761 (31.8%)                   | 48/761 (6.3%) | 19.8% |

### **Harm**

We identified a total of 48 incidents of harm, representing 21 harm events per 1000 patient days and 6 harm events per 100 consultations/admissions.

The PPV of one or more triggers for identifying harm was 19.8% in the entire material.%. When calculations were made for admissions ( $n=761$ ) and outpatient care ( $n=242$ ) separately, PPV was 23.2% and 10.8%, respectively ( $p=0.03$ ). - When we looked at the PPV of individual triggers, PPV varied from zero in the case of hypoxia, thrombocytopenia and electrolyte abnormalities to 100% in the case of surgical site infection and nosocomial pneumonia (Table 13).

The distribution of the 48 patients with identified harm according to status as admitted or outpatient, as well as their distribution across specialties are presented in Figure 3.

60,4% of the harm events were in the pediatric (medical) patients, whereas 22,9% occurred in ENT patients, 10,4% in orthopedic and 6,3% in general surgical patients.

Harm was detected in 5% of all pediatric contacts, whereas in the pediatric admissions we found a 7% harm rate. The incidence of harm in all contacts and in admissions only regardless of specialty was 6,3% and 8,3%, respectively.

Table 24 shows rate of trigger positive contacts, rate of harm and PPV across specialties.

#### *Categories of harm*

All, but two (E) identified harm events were categorized as harm category F, 'Temporary harm to the patient and required initial or prolonged hospitalization'.

#### *Examples of harm*

##### *Pediatric*

- Postoperative pericarditis
- Heus after gastrostomy.
- Candida stomatitis after treatment with antibiotics
- Infection in percutaneous endoscopic gastrostomy (PEG)
- Bleeding following placement of nasogastric feeding tube (harm category E)
- Nosocomial infection (gastroenteritis, pneumonia)

##### *Orthopedic*

- Osteomyelitis after pinning of Bennet's fracture

##### *General surgical*

- Hematoma scrotum after hernia operation (outpatient: category E)

##### *Ear, Nose and Throat*

- Bleeding infection and/or dehydration following adenotonsillectomy

Formatted: Font: Not Italic



### **Inter-rater agreement**

In the 10 patient records that were screened by the AHUS GTT team as well as by ALS, inter-rater agreement was high both with regards to the triggers identified, and as to whether harm had detected or not across specialties.

### **Compared to GTT data in our hospital**

Screening of 200 patient records representing 1145 patient days revealed 45 incidents of harm (22,5% of the patients (equals 22,5 per 100 patients) or 39 per 1000 patient-days).[9] In our patients, readmissions and hypoxia were the most frequent triggers, whereas the most frequently found triggers in the adults were urinary tract infection, pneumonia, drug related harm and pressure ulcer (not published).

### **Voluntary incidence reports**

The majority of incidents reported were minor incidents like delay in medication administration not leading to patient harm.

Patient harm as defined by the PTT user guide was found in 51/160 (30,9%) of the incidence reports 2010-2012. 37 harm events were classified as harm category E, 8 category F, 3 category G, 1 category H and 2 category I. This equals 51/5854 (total number of patients admitted acutely with medical diagnoses 2010-2012) = 0,9%. Only three of these incidents were reported in the PTT study months giving a voluntary reported harm rate of 3/584 (number of pediatric patients in the PTT screening) = 0,5% in March-May 2011.

Patient harm reported through the incidence reporting system included unexpected patient death; fall injury; pain and swelling from subcutaneous peripheral venous catheter; complications to procedure; anaphylactic drug reactions; and prolonged hospitalization due to errors in medication and fluid administration.

## DISCUSSION

Formatted: Font: Bold

~~Our paediatric centre is the largest acute paediatric unit in Norway, but we do not have a PICU in our hospital. Therefore, we do not treat the most severely ill children, and we only rarely use potent anaesthesia medications. This is probably the reason. This is the first report about use of a PTT in a European unit. Despite the fact that only half of the NHS paediatric triggers were found in the patient records screened in this study, we identified a ten times higher harm rate using the PTT than what was reported in the department's voluntary incidence reports in the same period. Patient harm identified through incidence report analysis and PTT screening was different in number and character in our unit.~~

~~Our paediatric centre is the largest acute paediatric unit in Norway, but we do not have a PICU in our hospital. Therefore, we do not treat the most severely ill children, and we only rarely use potent anaesthesia medications. This may be one of the reasons why half of the NHS triggers were not found in our ~~material~~ review, reflecting that some diagnoses and interventions with a high incidence of complications are not present in the children and adolescents in our unit.~~

In the recently published Canadian Paediatric Adverse Events Study, the incidence, type, ~~and~~ severity ~~and preventability~~ of harm among children admitted to academic paediatric centers were compared with those admitted to community hospitals in Canada. [6,8] In that study, ~~academic paediatric centers were defined as paediatric hospitals with a full-time core postgraduate training program in paediatrics and paediatric surgery in addition to a level 3 NICU. Community hospitals were defined as having 1000 or more paediatric admissions, including newborns, per year, a NICU or~~

1  
2  
3  
4  
5  
6 ~~special care nursery, and no full time core pediatric or pediatric surgical residency~~  
7 ~~training. Our pediatric centre, although being an academic teaching unit, probably has~~  
8 ~~a patient population with disease severity and complexity somewhere in between the~~  
9 ~~two compared unit levels in the Canadian study.~~

10  
11  
12 ~~In the Canadian Pediatric Adverse Events Study~~ significantly more patient  
13 ~~charts/records~~ from academic pediatric centers (38.8%) than from community  
14 hospitals (21.6%) were trigger-positive.[6][8] We found triggers in 31.8% of our  
15 patients. ~~This might reflect our status as somewhere in between a level 2 and level 3~~  
16 ~~pediatric unit.~~

17  
18  
19  
20  
21 The overall rate of harm in the Canadian study was 9.2% with significantly more  
22 harms in academic pediatric centers (11.2%) than in community hospitals (3.3%).  
23 We found a total rate of harm in admitted children of 8.3%, ~~again possibly in~~  
24 ~~accordance with our department's "in-between" status.%. These results might reflect~~  
25 ~~that, although being an academic teaching unit, our center probably has a patient~~  
26 ~~population with disease severity and complexity somewhere in between the two~~  
27 ~~compared unit levels in the Canadian study.~~

28  
29  
30  
31  
32 Kirkendall et al.[4][7] found 37 harm events per 100 patients and 76 harm events per  
33 1000 patient-days, a significantly higher rate ~~that than~~ in our patients. One of the  
34 reasons for this may be that the study was conducted in a large US tertiary centre  
35 where 32.5% of the patients went to the operating room during their hospital stay and  
36 13.3% were admitted to an ICU during part of or whole stay.

37  
38  
39  
40 We found a PPV of one or more triggers of 19.8% when both acute outpatient  
41 contacts and admissions were included and a higher PPV when only admissions were  
42 analyzed. Lemon and Stockwell found a PPV of 34%.[3][6] One of the possible  
43 reasons for this difference is that Lemon and Stockwell only screened for 11 triggers  
44 while we identified 20 different triggers, of which some had an individual PPV of  
45 zero. ~~Another important difference is that Lemon and Stockwell reported results from~~  
46 ~~a 4-year period whereas we only screened for a three-month period, which limits~~  
47 ~~generalizability.~~

48  
49  
50  
51 ~~Compared to GTT data in our hospital~~  
52  
53  
54  
55  
56  
57  
58  
59  
60

Formatted: Font color: Auto

1  
2  
3  
4  
5  
6 In addition to the different spectrum of triggers, two important distinctions between  
7 the GTT and our PTT screening were that in the GTT accidental trauma outside  
8 hospital and other health care institutions (i.e. harm not caused by health care) as well  
9 as febrile neutropenias (induced by chemotherapy) were defined as incidents of harm.

10  
11 This raises the important question of what can be defined as anticipated *side effects* of  
12 medical treatment and calculated risk and what should be defined as iatrogenic harm.

13  
14 Is for example chemotherapy induced leuko- or neutropenia preventable? If the  
15 purpose of trigger tool systems is to focus attention towards areas of improvement,  
16 harm that cannot be prevented by change in routines and procedures should not  
17 necessarily be registered in this system. Lemon and Stockwell classifies harm either  
18 as being preventable or nonpreventable. Like Kirkendall et al. [37] whereas Kirkendall  
19 et al. did not assess preventability. [4]

20  
21 Another issue raised is whether only “active delivery of harm” or also omission  
22 (substandard care) should count as harm in the PTT system. [4] According to the  
23 Institute for Healthcare Improvement, [2] harm includes only those adverse events  
24 related to the active delivery of harm (commission) and not issues related to  
25 substandard care (omission).

### 26 27 28 **Trigger versus harm**

29  
30 Like Kirkendall et al. [4] we found that some modules, in our case the laboratory  
31 module, contained adult oriented triggers like high INR and diagnostic imaging for  
32 embolus that are not applicable to our population and therefore not identified in our  
33 chart review. Removal of unnecessary triggers would reduce the overall number of  
34 triggers that reviewers must consider.

35  
36 Some triggers, e.g. complication of procedure or treatment and surgical site infection  
37 are themselves examples of harm. Nosocomial pneumonia and surgical site infection  
38 both had a PPV of 100% in our patients. Hypoxia, electrolyte abnormalities and  
39 thrombocytopenia had a PPV of zero and may not be worthwhile screening for with  
40 the PTT in our patient population.

### 41 42 43 **PTT versus voluntary incidence reporting**

Formatted: Font color: Black

Field Code Changed

1  
2  
3  
4  
5  
6 It has become evident from our study that patient harm identified through incidence  
7 report analysis and PTT screening are different in number and character in our unit.  
8 One of the most frequently reported error leading to harm in the incidence reports,  
9 'Error in medication/fluid therapy routines' could not be detected through the PTT  
10 medication module that only detects medication errors requiring antidote, antihista-  
11 mine and/or antiemetics; as well as abrupt medication stop.  
12  
13  
14

15 Classen et al.[10] found that the GTT identified more than 10 times more serious  
16 events than voluntary safety reports or the Agency for Healthcare Research and  
17 Quality's Patient Safety Indicators. We found a 3 times higher harm rate in the PTT  
18 screening (pediatric patients) than in the incidence reporting system.  
19  
20  
21

### 22 **Practical use of the PTT**

23 There are two published ways to use a trigger tool detection system:

- 24 1. For regular manual screening of a random pick of patient records. In this case, it is  
25 commonly said that the time spent for screening of individual charts should be limited  
26 to 20 minutes.
- 27 2. For automated electronic screening of all patient records.

28  
29  
30  
31  
32 we found that some modules, in particular the laboratory module, contained adult-  
33 oriented triggers like high INR and diagnostic imaging for embolus that were not  
34 identified in our chart review. Removal of unnecessary triggers would reduce the  
35 overall number of triggers that reviewers must consider. Hypoxia, electrolyte  
36 abnormalities and thrombocytopenia had a PPV of zero and may not be worthwhile  
37 screening for in our patient population. However, bearing in mind the short study  
38 period of 3 months, further studies, ideally multicenter studies are needed before  
39 abolishment of some triggers.  
40  
41  
42  
43  
44  
45

46 To our knowledge, we are the first group to report the use of a PTT for unplanned  
47 outpatient visits. Some trigger tools exist for outpatient care,[11,12,13] however they  
48 are not suitable for children and adolescents. As harm was detected in 7/267 (2.6%)  
49 of acute outpatient visits, we believe that identification of these events is important in  
50 a unit like ours where the number of acute outpatient visits is substantial.  
51  
52  
53  
54  
55  
56  
57  
58  
59  
60

1  
2  
3  
4  
5  
6 Regardless, there seems to be a higher PPV of triggers in surgical patients, but the rate  
7 of harm was comparable across medical and surgical patients (5-6%), excluding ENT  
8 patients with a 35% total harm rate.  
9

10  
11 Needless to say, the extent to which trigger tools detect harm as intended depends to a  
12 large extent on routines for documentation. Like Kirkendall et al.,<sup>[47]</sup> we noticed  
13 that frequently occurring complications like complications to peripheral venous  
14 catheters (e.g. phlebitis, subcutaneous edema, tissue necrosis and infection), are  
15 infrequently documented in the records of the patients in our unit. The same ~~is the~~  
16 ~~case for~~ applies to the incidence reporting system that contains information about only  
17 a small fraction of these types of patient harm. Hence, certain types of patient harm  
18 that are frequently occurring and should be targeted by interventions are not detected  
19 in ~~its~~ their full extent neither with the PTT nor through voluntary incidence reporting.  
20  
21  
22  
23  
24

### 25 Limitations of the study

26  
27 The PTT screening and incident report analyses were ~~mainly~~ performed by only one  
28 investigator, and inter-rater agreement could not be ~~properly~~ assessed in this study.  
29 ~~Also, this was a relatively small single-center study and generalizability of our results~~  
30 ~~is~~ The judgment regarding whether harm was present and how severe was left to one  
31 person, with no one to validate the findings. To our knowledge, the PTT is not  
32 established in any Norwegian pediatric unit, and we did not succeed in finding a  
33 person with both time and experience to validate the findings. For the same reason,  
34 this was a relatively small single-center study and the study period was short. Some of  
35 the triggers that were not identified during the three study months could possibly have  
36 been detected if we screened for a longer period. The decision to also screen  
37 unplanned outpatient contacts as well as including all sodium and potassium levels  
38 out of range were deviations from the PTT user guide that could potentially bias our  
39 results. However, as the outpatient contacts and admissions are to a large extent  
40 reported separately, and as the sodium and potassium trigger did not predict harm in  
41 any of our patients, we believe that these factors did not influence the main  
42 conclusions of the study. Generalizability of our results may be limited to  
43 contexts/settings with similar organization of specialist healthcare including referral  
44 practices. However, it is important that utility studies performed in ~~different context~~  
45 ~~be publishes~~ various patient groups be published in order for clinicians to judge  
46  
47  
48  
49  
50  
51  
52  
53  
54  
55  
56  
57  
58  
59  
60

Formatted: Space After: 0 pt,  
No widow/orphan control, Don't  
adjust space between Latin and  
Asian text, Don't adjust space  
between Asian text and numbers

1  
2  
3  
4  
5  
6 applicability of the results to their practice.  
7  
8  
9  
10  
11  
12  
13  
14  
15  
16  
17  
18  
19  
20  
21  
22

## 23 24 25 26 27 28 29 **CONCLUSION**

30  
31 Using the NHS Paediatric Trigger tool we found a rate of trigger positive contacts and  
32 a rate of harm comparable to an extensive Canadian review. ~~The~~ PTT made us able to  
33 detect more ~~and different types of~~ harm among our children and adolescents than  
34 what we detect by our routine system for ~~reporting~~ patient harm.  
35  
36

37  
38 ~~Like Kendall et al.[4] we conclude that the~~ ~~The~~ presence of adult-oriented triggers,  
39 triggers that were not identified at all, as well as triggers with a low predictive value  
40 for harm, ~~highlight the indicate a~~ need for modification of trigger tools to the  
41 ~~context~~ ~~setting~~ in which they are intended to be used. The NHS PTT, with certain  
42 modifications ~~to our context~~ can, as a supplement to voluntary incidence reporting, be  
43 used to calculate the rate of harm and identify areas of care where most harm events  
44 are occurring. Hence, it may inform priorities for action and track improvements over  
45 time.  
46  
47  
48  
49  
50  
51  
52  
53  
54  
55  
56  
57  
58  
59  
60

Formatted: Font: Not Bold

Formatted: None

Formatted: Font: Times New Roman, 12 pt

Formatted: Font color: Black

## ACKNOWLEDGEMENT

The authors wish to thank Gunnvor Flaa Marum in the AHUS GTT team for assisting in the PTT screening.

Formatted: Font color: Gray-85%



1  
2  
3  
4  
5  
6  
7  
8  
9  
10  
11  
12  
13  
14  
15  
16  
17  
18  
19  
20  
21  
22  
23  
24  
25  
26  
27  
28  
29  
30  
31  
32  
33  
34  
35  
36  
37  
38  
39  
40  
41  
42  
43  
44  
45  
46  
47  
48  
49  
50  
51  
52  
53  
54  
55  
56  
57  
58  
59  
60

**CONTRIBUTOR STATEMENT**

ALS was the lead author for this paper and involved in all stages including design of the research, acquisition of data, analysis and interpretation of the data and statistical analysis. BN contributed to the drafting of the manuscript, critical revision of the manuscript and supervision.

**FUNDING**

None

**DATA SHARING STATEMENT**

No additional data available

## REFERENCES

1. Institute for Healthcare Improvement. The Paediatric Trigger Tool User Guide. Coventry: NHS Institute for Innovation and Improvement; 2010.
2. Griffin FA RR. HI Global Trigger Tool for Measuring Adverse Events. 2 ed. Cambridge: Institute for Healthcare Improvement; 2009.
3. Lemon V, Stockwell DC. Automated detection of adverse events in children. *Pediatr Clin North Am.* 2012;59:1269-78.
4. Kirkendall ES, Kloppenborg E, Papp J, et al. Measuring adverse events and levels of harm in pediatric inpatients with the Global Trigger Tool. *Pediatrics.* 2012;130:e1206-14.
5. Nasjonal Enhet for Pasientsikkerhet. Available at: <http://www.pasientsikkerhetskampanjen.no/>. Accessed September 29, 2013.
6. Matlow AG, Baker GR, Flintoft V, et al. Adverse events among children in Canadian hospitals: the Canadian Paediatric Adverse Events Study. *CMAJ.* 2012;184:E709-18.
7. Solevag AL, Eggen EH, Schroder J, et al. Use of a modified pediatric early warning score in a department of pediatric and adolescent medicine. *PLoS One.* 2013;8:e72534.
8. National Coordinating Council for Medication Error Reporting and Prevention (NCC MERP). National Coordinating Council for Medication Error Reporting and Prevention (NCC MERP) Taxonomy of Medication Errors; 1996, revised 2001. Available from: <http://www.NCCMERP.org>. Accessed September 29, 2013.
9. Akershus University Hospital. Pasientskader og kvalitetsarbeid ved Akershus universitetssykehus. 2011. Available at: <http://www.ahus.no/aktuelt/nyheter/Sider/pasientskader-og-kvalitetsarbeid-ved-akershus-universitetssykehus.aspx>. Accessed September 29, 2013.
10. Classen DC, Resar R, Griffin F, et al. 'Global trigger tool' shows that adverse events in hospitals may be ten times greater than previously measured. *Health Aff (Millwood).* 2011;30:581-9.
11. Gandhi TK, Seger AC, Overhage JM, et al. Outpatient adverse drug events identified by screening electronic health records. *J Patient Saf.* 2010;6:91-6.
12. Institute for Healthcare Improvement. IHI Outpatient Adverse Event Trigger Tool. 2011. Available at:

- 1  
2  
3  
4  
5  
6 <http://www.ihl.org/knowledge/Pages/Tools/OutpatientAdverseEventTriggerTool.aspx> Accessed September 29, 2013. 1. Kohn LT, Corrigan J, Donaldson MS (2000) To err is human : building a safer health system. Washington, D.C.: National Academy Press. xxi, 287 p. p.
- 11 2. Leape LL, Woods DD, Hatlie MJ, Kizer KW, Schroeder SA, et al. Promoting patient safety by preventing medical error. JAMA 1998;280:1444-1447.
- 13 3. Layde PM, Cortes LM, Teret SP, Brasel KJ, Kuhn EM, et al. Patient safety efforts should focus on medical injuries. JAMA 2002;287:1993-1997.
- 17 4. NHS Institute for Innovation and Improvement (2010) The Paediatric Trigger Tool User Guide. Coventry: NHS Institute for Innovation and Improvement.
- 20 5. Griffin F RR (2009) IHI Global Trigger Tool for measuring adverse events. Cambridge, Massachusetts.
- 23 6. Lemon V, Stockwell DC. Automated detection of adverse events in children. Pediatr Clin North Am 2012;59:1269-1278.
- 26 7. Kirkendall ES, Kloppenborg E, Papp J, White D, Frese C, et al. Measuring adverse events and levels of harm in pediatric inpatients with the Global Trigger Tool. Pediatrics 2012;130:e1206-1214.
- 29 8. Matlow AG, Baker GR, Flintoft V, Cochrane D, Coffey M, et al. Adverse events among children in Canadian hospitals: the Canadian Paediatric Adverse Events Study. CMAJ 2012;184:E709-718.
- 32 9. Solevag AL, Eggen EH, Schroder J, Nakstad B. Use of a modified pediatric early warning score in a department of pediatric and adolescent medicine. PLoS One 2013;8:e72534.
- 35 10. National Coordinating Council for Medication Error Reporting and Prevention (NCC MERP) (1996, revised 2001) National Coordinating Council for Medication Error Reporting and Prevention (NCC MERP) Taxonomy of Medication Errors; Available at <http://www.NCCMERP.org>.
- 38 11. Griffin FA RR (2009) HI Global Trigger Tool for Measuring Adverse Events. Cambridge: Institute for Healthcare Improvement.
- 41 12. Gandhi TK, Seger AC, Overhage JM, Murray MD, Hope C, et al. Outpatient adverse drug events identified by screening electronic health records. J Patient Saf 2010;6:91-96.
- 44 13. Institute for Healthcare Improvement (2011) IHI Outpatient Adverse Event Trigger Tool. In: Improvement IfH, editor. Cambridge.
- 56  
57  
58  
59  
60

Table 1 The Paediatric Trigger Tool (PTT) items as depicted in the NHS PTT User Guide[4]

|                       | <b>Item</b>                                                              |
|-----------------------|--------------------------------------------------------------------------|
| <b>General care</b>   | PG1 Early warning score                                                  |
|                       | PG2 Tissue damage or pressure ulcer                                      |
|                       | PG3 Readmission within 30 days                                           |
|                       | PG4 Unplanned admission                                                  |
|                       | PG5 Abnormal cranial imaging                                             |
|                       | PG6 Respiratory or cardiac arrest / crash calls                          |
|                       | PG7 Diagnostic imaging for embolus / thrombus +/- confirmation           |
|                       | PG8 Complication of procedure or treatment                               |
|                       | PG9 Transfer to higher level of care                                     |
|                       | PG10 Hypoxia O2 sat <85%                                                 |
|                       | PG11 Cancelled elective procedure / delayed discharge                    |
| <b>Surgical care</b>  | PS1 Return to theatre                                                    |
|                       | PS2 Change in planned procedure                                          |
|                       | PS3 Surgical site infection or hospital acquired urinary tract infection |
|                       | PS4 Removal/injury/repair of organ                                       |
| <b>Intensive care</b> | IP1 Readmission to Intensive Care or High Dependency Care                |
| <b>Medication</b>     | PM1 Vitamin K (except for routine dose in neonates)                      |
|                       | PM2 Naloxone                                                             |
|                       | PM3 Flumazenil (Romazicon)                                               |
|                       | PM4 Glucagon or glucose $\geq 10\%$                                      |
|                       | PM5 Chlorphenamine or antihistamine                                      |
|                       | PM6 Anti-emetics                                                         |
|                       | PM7 IV Bolus $\geq 10\text{ml/kg}$ colloid or crystalloid given          |
|                       | PM8 Abrupt medication stop                                               |
| <b>Lab test</b>       | PL15 Thrombocytopenia (platelets <100)                                   |
|                       | PL1 High INR >5 or aPTT >100                                             |
|                       | PL2 Transfusion                                                          |
| <b>Biochemistry</b>   | PL3 Abrupt drop in Hb or Hct (>25%)                                      |
|                       | PL4 Rising urea or creatinine (>2x baseline)                             |
|                       | PL5/PL6 Electrolyte abnormalities (Na+ <130 or >150, K+ <3.0 or >6.0)    |
|                       | PL7 Hypoglycemia (<3mmol/l)                                              |
|                       | PL8 Hyperglycemia (>12mmol/l)                                            |
|                       | PL9 Drug level out of range                                              |
| <b>Microbiology</b>   | PL10 MRSA bacteraemia                                                    |
|                       | PL11 C. difficile                                                        |
|                       | PL12 Vanc resistant enterococcus (VRE)                                   |
|                       | PL13 Nosocomial pneumonia                                                |
|                       | PL14 Positive blood culture                                              |
| <b>Other</b>          | PO1 Other event                                                          |

1  
2  
3  
4  
5  
6  
7  
8  
9  
10  
11  
12  
13  
14  
15  
16  
17  
18  
19  
20  
21  
22  
23  
24  
25  
26  
27  
28  
29  
30  
31  
32  
33  
34  
35  
36  
37  
38  
39  
40  
41  
42  
43  
44  
45  
46  
47  
48  
49  
50  
51  
52  
53  
54  
55  
56  
57  
58  
59  
60

Table 2 Distribution of trigger positive admissions and outpatient contacts across specialties

|                               | <u>Pediatric</u> |                             | <u>Ortopedic</u> |                   | <u>General surgical</u> |                   | <u>Ear, nose and throat</u> |                   |
|-------------------------------|------------------|-----------------------------|------------------|-------------------|-------------------------|-------------------|-----------------------------|-------------------|
|                               | <u>Admitted</u>  | <u>Outpati</u><br><u>it</u> | <u>Admitted</u>  | <u>Outpatient</u> | <u>Admitted</u>         | <u>Outpatient</u> | <u>Admitted</u>             | <u>Outpatient</u> |
| <u>Total n (%)</u>            | <u>356 (47)</u>  | <u>228</u><br><u>(30)</u>   | <u>70 (9)</u>    | <u>13 (2)</u>     | <u>41 (5)</u>           | <u>22 (3)</u>     | <u>27 (3.5)</u>             | <u>4 (0.5)</u>    |
| <u>Trigger positive n (%)</u> | <u>148 (61)</u>  | <u>59</u><br><u>(24.5)</u>  | <u>8 (3.5)</u>   | <u>3 (1)</u>      | <u>10 (4)</u>           | <u>2 (1)</u>      | <u>11 (4.5)</u>             | <u>1 (0.5)</u>    |
| <u>Harm n</u>                 | <u>26</u>        | <u>3</u>                    | <u>3</u>         | <u>2</u>          | <u>1</u>                | <u>2</u>          | <u>11</u>                   | <u>0</u>          |

For peer review only

Table 3 The triggers we identified in our study are presented with positive predictive value (PPV) with 95% confidence interval (CI) for identifying harm. The numerator represents number of harm events and the denominator how many times each individual trigger was found in all patient contacts (n=761)

|                       | <b>Item</b>                                                                              | <b>PPV (CI)%</b> |
|-----------------------|------------------------------------------------------------------------------------------|------------------|
| <b>General care</b>   | <u>PG1 Early warning score</u>                                                           |                  |
|                       | <u>PG2 Tissue damage or pressure ulcer</u>                                               |                  |
|                       | <u>PG3 Readmission within 30 days</u>                                                    | 24/175=14 (9-20) |
|                       | <u>PG4 Unplanned admission</u>                                                           |                  |
|                       | <u>PG5 Abnormal cranial imaging</u>                                                      |                  |
|                       | <u>PG6 Respiratory or cardiac arrest / crash calls</u>                                   | 0/1=0 (0-95)     |
|                       | <u>PG7 Diagnostic imaging for embolus / thrombus +/- confirmation</u>                    | 1/2=50 (3-97)    |
|                       | <u>PG8 Complication of procedure or treatment</u>                                        | 17/23=74 (51-89) |
|                       | <u>PG9 Transfer to higher level of care</u>                                              | 3/22=14 (4-36)   |
|                       | <u>PG10 Hypoxia O2 sat &lt;85%</u>                                                       | 0/25=0 (0-17)    |
|                       | <u>PG11 Cancelled elective procedure / delayed discharge</u>                             | 1/1=100 (5-100)  |
| <b>Surgical care</b>  | <u>PS1 Return to theatre</u>                                                             | 1/1=100 (5-100)  |
|                       | <u>PS2 Change in planned procedure</u>                                                   |                  |
|                       | <u>PS3 Surgical site infection or hospital acquired urinary tract infection</u>          | 6/6=100 (52-100) |
|                       | <u>PS4 Removal/injury/repair of organ</u>                                                |                  |
| <b>Intensive care</b> | <u>IP1 Readmission to Intensive Care or High Dependency Care</u>                         |                  |
| <b>Medication</b>     | <u>PM1 Vitamin K (except for routine dose in neonates)</u>                               |                  |
|                       | <u>PM2 Naloxone</u>                                                                      |                  |
|                       | <u>PM3 Flumazenil (Romazicon)</u>                                                        |                  |
|                       | <u>PM4 Glucagon or glucose <math>\geq 10\%</math></u>                                    |                  |
|                       | <u>PM5 Chlorphenamine or antihistamine</u>                                               | 0/1=0 (0-95)     |
|                       | <u>PM6 Anti-emetics</u>                                                                  |                  |
|                       | <u>PM7 IV Bolus <math>\geq 10\text{ml/kg}</math> colloid or crystalloid given</u>        | 3/19=16 (4-40)   |
|                       | <u>PM8 Abrupt medication stop</u>                                                        |                  |
| <b>Lab test</b>       | <u>PL15 Thrombocytopenia (platelets &lt;100)</u>                                         | 0/7=0 (0-44)     |
|                       | <u>PL1 High INR &gt;5 or aPTT &gt;100</u>                                                |                  |
|                       | <u>PL2 Transfusion</u>                                                                   | 2/8=25 (4-64)    |
| <b>Biochemistry</b>   | <u>PL3 Abrupt drop in Hb or Hct (&gt;25%)</u>                                            | 2/8=25 (4-64)    |
|                       | <u>PL4 Rising urea or creatinine (&gt;2x baseline)</u>                                   | 0/1=0 (0-95)     |
|                       | <u>PL5/PL6 Electrolyte abnormalities (Na+ &lt;130 or &gt;150, K+ &lt;3.0 or &gt;6.0)</u> | 0/12=0 (0-30)    |
|                       | <u>PL7 Hypoglycemia (&lt;3mmol/l)</u>                                                    | 3/8=38 (10-74)   |
|                       | <u>PL8 Hyperglycemia (&gt;12mmol/l)</u>                                                  | 0/1=0 (0-95)     |
|                       | <u>PL9 Drug level out of range</u>                                                       |                  |
| <b>Microbiology</b>   | <u>PL10 MRSA bacteraemia</u>                                                             |                  |
|                       | <u>PL11 C. difficile</u>                                                                 |                  |
|                       | <u>PL12 Vanc resistant enterococcus (VRE)</u>                                            |                  |
|                       | <u>PL13 Nosocomial pneumonia</u>                                                         | 2/2=100 (20-100) |
| <b>Other</b>          | <u>PO1 Other event</u>                                                                   | 1/1=100 (5-100)  |

Table 4 Rate of trigger positive contacts, rate of harm and positive predictive value (PPV) of positive triggers across specialties

| <u>Specialty</u>            | <u>Rate of trigger positive contacts</u> | <u>Rate of harm</u>  | <u>PPV</u>   |
|-----------------------------|------------------------------------------|----------------------|--------------|
| <u>Pediatric</u>            | <u>207/584 (35.4%)</u>                   | <u>29/584 (5.0%)</u> | <u>14%</u>   |
| <u>Orthopedic surgery</u>   | <u>11/83 (13.3%)</u>                     | <u>5/83 (6.0%)</u>   | <u>45.5%</u> |
| <u>General surgery</u>      | <u>12/63 (19.0%)</u>                     | <u>3/63 (4.8%)</u>   | <u>25%</u>   |
| <u>Ear, Nose and Throat</u> | <u>12/31 (38.7%)</u>                     | <u>11/31 (35.5%)</u> | <u>91.7%</u> |
| <u>Total</u>                | <u>242/761 (31.8%)</u>                   | <u>48/761 (6.3%)</u> | <u>19.8%</u> |

# BMJ Open

## Utility of a Pediatric Trigger Tool in a Norwegian Department of Pediatric and Adolescent Medicine

|                                 |                                                                                                                                                                                                                                                               |
|---------------------------------|---------------------------------------------------------------------------------------------------------------------------------------------------------------------------------------------------------------------------------------------------------------|
| Journal:                        | <i>BMJ Open</i>                                                                                                                                                                                                                                               |
| Manuscript ID:                  | bmjopen-2014-005011.R2                                                                                                                                                                                                                                        |
| Article Type:                   | Research                                                                                                                                                                                                                                                      |
| Date Submitted by the Author:   | 10-Apr-2014                                                                                                                                                                                                                                                   |
| Complete List of Authors:       | Solevåg, Anne Lee; Akershus University Hospital, The Department of Pediatric and Adolescent Medicine<br>Nakstad, Britt; Akershus University Hospital, The Department of Pediatric and Adolescent Medicine; University of Oslo, Institute of Clinical Medicine |
| <b>Primary Subject Heading</b>: | Paediatrics                                                                                                                                                                                                                                                   |
| Secondary Subject Heading:      | Paediatrics                                                                                                                                                                                                                                                   |
| Keywords:                       | Quality in health care < HEALTH SERVICES ADMINISTRATION & MANAGEMENT, Risk management < HEALTH SERVICES ADMINISTRATION & MANAGEMENT, PAEDIATRICS                                                                                                              |
|                                 |                                                                                                                                                                                                                                                               |

SCHOLARONE™  
Manuscripts

Peer Review Only



1  
2  
3  
4 Title: Utility of a Pediatric Trigger Tool in a Norwegian Department of Pediatric and  
5 Adolescent Medicine  
6  
7  
8  
9  
10

11  
12  
13  
14  
15 Authors:

16 Anne Lee Solevåg<sup>1</sup>

17  
18  
19 Britt Nakstad<sup>1,2</sup>  
20  
21  
22  
23

24  
25 <sup>1</sup>The Department of Pediatric and Adolescent Medicine, Akershus University  
26 Hospital, 1478 Lørenskog, Norway  
27

28  
29 <sup>2</sup>Institute of Clinical Medicine, University of Oslo, Oslo, Norway  
30  
31  
32  
33

34 Corresponding author:

35  
36 Anne Lee Solevåg (MD, PhD), The Department of Pediatric and Adolescent  
37 Medicine, Akershus University Hospital, 1478 Lørenskog, Norway  
38  
39

40 Tlph: +47 67964520/+47 41469314, Fax: +47 67960900  
41  
42

43 E-mail: [a.l.solevag@medisin.uio.no](mailto:a.l.solevag@medisin.uio.no)  
44  
45  
46  
47  
48  
49

50 Keywords: Pediatrics, Quality in health care  
51  
52  
53  
54

55 Word count of abstract: 299

Word count: 3022  
56  
57  
58  
59  
60

## ABSTRACT

### Objectives

The British National Health Service (NHS) Paediatric Trigger Tool (PTT) was made based on various trigger tools developed for use in adults. The PTT has not previously been developed or used in Nordic units. We aimed to compare harm identified through PTT screening with voluntary incidence reports in our department. A secondary aim was to assess utility of the different triggers, including predictive value for identifying harm. We hypothesized that the NHS PTT would need adjustments for the setting in which it is used.

### Setting

A Norwegian level II department of pediatric and adolescent medicine.

### Participants

A convenience sample of 761 acute medical and surgical patient contacts March-May 2011. Median age (IQR) for the trigger positive patients was 2.5 (1.0-8.0) years; range 0-18 years.

### Primary and secondary outcome measures

The type and rate of identified harm compared to the department's voluntary incidence reports. The type and rate of identified triggers and positive predictive value for harm.

### Results

The PTT revealed a harm rate of 5% for medical patients, as compared to 0.5% in the incidence reports the same months. PTT screening revealed other types of harm than those reported by health care personnel themselves. We identified only 20 out of the 39 NHS PTT triggers. The most frequent trigger was re-admission within 30 days. Hypoxia, which was the second most frequent trigger, did not predict any patient harm.

### Conclusion

This study showed that the NHS PTT identifies more and other types of harm than voluntary incidence reports. The presence of adult-oriented triggers, triggers that were

1  
2  
3 not identified at all, as well as triggers with a low predictive value for harm may  
4 indicate the need for modification of the PTT to different settings. More studies are  
5 needed before a final decision is made to exclude triggers from the screening.  
6  
7  
8  
9

## 10 11 **ARTICLE SUMMARY**

12  
13 Strengths and limitations of this study

- 14  
15 ○ There is a limited understanding of how structured patient safety work in  
16  
17 pediatrics can be performed
- 18  
19 ○ We investigated utility of The British National Health Service Paediatric  
20  
21 Trigger Tool (PTT) in a level II pediatric unit and found that the tool should  
22  
23 probably be modified to different settings
- 24  
25 ○ Previous to this study, only one major pediatric trigger tool has been published  
26  
27 in peer review journal format and none have been applied in outpatient  
28  
29 settings
- 30  
31 ○ This review is based on a significant amount of patient data. However, the  
32  
33 single-center character and the short study period call for additional studies,  
34  
35 preferentially multicenter studies  
36  
37  
38  
39  
40  
41  
42  
43  
44  
45  
46  
47  
48  
49  
50  
51  
52  
53  
54  
55  
56  
57  
58  
59  
60

## INTRODUCTION

By identifying recurring medical errors focused efforts can be made to improve patient safety.[1,2] However, medical errors do not always lead to harm to the patient. Patient harm can be caused by medical error, but can also occur as a result of a diagnostic or treatment procedure in the absence of a medical error.[3]

So-called ‘trigger tools’ focus on patient harm, not errors, and can in combination with more traditional incident reporting in healthcare help departments and hospitals focus their improvement work to reduce the overall rate of patient harm.[4] The global trigger tool (GTT) is a retrospective method for detecting iatrogenic harm [5] and has been used as a benchmarking system and means for monitoring change over time. A trigger has been defined as data present in the patient record that can directly or indirectly, by providing a clue for further investigation, represent an adverse event that caused patient harm.[6,7] The GTT has become a widely used tool in patient safety work. However, the understanding of health care–associated harm in children is limited as compared to adults and only recently a comprehensive pediatric trigger tool has been developed.[8]

The National Health Service (NHS) Paediatric Trigger Tool (PTT) was made based on various trigger tools for use in adults with the support of clinicians in nine UK hospitals, and was meant to be useful for district general hospitals, acute teaching hospitals and specialist pediatric centers.[4] However, there is a need for determining utility of such instruments derived from adult care in different institutions and patient groups. The items comprising the PTT should be piloted in different settings in order to remove unnecessary or adult-oriented triggers and/or add more relevant triggers.[7]

Hence, we aimed to examine utility of the NHS PTT in a large Nordic department of pediatrics and if needed adjust the tool for use in our patients.

Our primary focus was to examine if or to which extent the PTT detected patient harm in medical and surgical patients in our department and compare these results with voluntary incidence reports. A secondary aim was to assess utility of the different triggers, including predictive value of individual triggers for identifying harm.

## METHODS

The study was approved as part of quality improvement activities by the institutional review board at Akershus University Hospital (AHUS)

### Setting

AHUS is located outside the Norwegian capital Oslo. The hospital is the single largest acute hospital in Norway and offers a full range of medical services except cardiac and neurosurgery, as well as treatment of severe traumatic injuries. AHUS does not have a pediatric intensive care unit (PICU), but transfers children below the age of three years in need for intensive care to a nearby university hospital. Critically ill children between three and 18 years are treated in the intensive care unit (ICU) for adults in AHUS. The hospital introduced early warning scoring systems after this study. Routine GTT screening has been performed since 2007.

The Department of Pediatric and Adolescent Medicine is a 37-bed level II unit. Children and adolescents between zero and 18 years of age referred by general physicians for acute specialist care are examined in the children's emergency department (ED) and about 50% are admitted. Registration of patient harm in our unit is exclusively based on voluntary reporting through an electronic incidence reporting system called Extend Quality System (EQS).

### PTT screening

We did a manual review of unplanned patient visits to the children's ED using the NHS Paediatric Trigger Tool User guide.[4] For convenience, we included the visits that were documented for the purpose of evaluating the introduction of a pediatric early warning score in our department over a three month period.[9] These visits represented 95% of all contacts in the children's ED in the study months. Pediatric (medical), as well orthopedic, general surgical; and ear, nose and throat (ENT) patients below the age of 18 years were included and the results were recorded in Excel spreadsheets (Microsoft Excel 2008 for Mac (Redmond, WA, US)).

The PTT screening was performed by the primary investigator (ALS) who is a consultant pediatrician in the department. Because AHUS is the first hospital in Norway to screen for pediatric triggers, there are no courses or formal training in the

1  
2  
3 PTT available in Norway. Hence, to get a general idea about the concept of trigger  
4 tools, ALS attended a full-day course in the GTT organized by The Norwegian  
5 Knowledge Centre for the Health Services. In addition, she received instructions from  
6 the GTT team at AHUS based on their review methodology and PTT screening of 10  
7 patient records was performed in collaboration with a representative from the GTT  
8 team.  
9

10  
11  
12  
13  
14 The PTT consists of 39 items described in Table 1. The patient records were reviewed  
15 in the following order: Diagnoses and treatment procedures, discharge summaries,  
16 medication charts, laboratory results, operation notes, nurse notes, physician notes and  
17 admission note. Because only half of the acute referrals result in an admission, our  
18 practice differs from most medical departments for adults where a larger proportion of  
19 acutely referred patients are being admitted. The PTT user guide dictates a minimum  
20 length of stay of 8 hours.[4] However, as we argue that our threshold for admitting  
21 patients from the children's ED is high with often only slight differences in disease  
22 severity and complexity between those who are admitted and those who are not, we  
23 included also acute outpatient visits in our screening. In our unit fluid replacement  
24 therapy has been an area of improvement. In an attempt to increase detection rates for  
25 harm causes by intravenous fluid therapy, we chose to register all patient contacts  
26 with the diagnoses hypo-/hyperkalemia and/or hypo-/hypernatremia as trigger positive  
27 regardless of the definitions used in the PTT user guide for these triggers (Table 1).  
28 Otherwise, we strictly followed the definitions and guidelines outlined in the user  
29 guide.  
30  
31

32  
33  
34  
35  
36  
37  
38  
39  
40  
41 The PTT uses an adapted version of the National Coordinating Council for  
42 Medication Error Reporting and Prevention (NCC MERP) 'Index for Categorizing  
43 Errors'. [10] The rationale for this is that the NHS focuses on adverse events that  
44 cause actual patient harm and not medical errors that have a potential for patient  
45 harm. Therefore, only the NCC MERP categories E through I are included:  
46 Temporary harm to the patient and required intervention (category E), temporary  
47 harm to the patient and required initial or prolonged hospitalization (category F),  
48 permanent patient harm (category G), intervention required to sustain life (category  
49 H), and patient death (category I).  
50  
51  
52  
53  
54  
55  
56  
57  
58  
59  
60

1  
2  
3 Harm identified through PTT screening was compared to harm identified through  
4 voluntary incidence reports in the department.  
5  
6

### 7 **Voluntary incidence reporting**

8

9  
10 ALS read and classified patient related incidents regarding pediatric (medical)  
11 patients reported in the EQS in March until May 2011. The rate of harm reported in  
12 incidence reports during these three months was low. Therefore all reports in an  
13 extended period of time, 2010-2012, were included. Patient harm identified in the  
14 incidence reports was classified from E through I for comparison to the findings from  
15 the PTT screening.  
16  
17  
18  
19

### 20 **Statistical analyses**

21

22  
23 Data were analyzed using PASW<sup>®</sup> Statistics 18.0 software (SPSS Inc., Chicago, IL).  
24 Comparisons between groups were made using the Chi-square test for categorical  
25 variables and Mann-Whitney *U* test for continuous variables. P-values <0.05 were  
26 considered significant. Positive predictive value (PPV) with 95% confidence interval  
27 (CI) for triggers was calculated and we calculated number of harm events per 1000  
28 patient days and 100 patient contacts.  
29  
30  
31  
32  
33  
34  
35  
36  
37  
38  
39  
40  
41  
42  
43  
44  
45  
46  
47  
48  
49  
50  
51  
52  
53  
54  
55  
56  
57  
58  
59  
60

## RESULTS

From March 15<sup>th</sup> until May 31<sup>st</sup> 2011 761 patient records, representing 2268 patient days were screened for triggers. Median age (IQR) in years was 3.5 (1.2-11.0) for all patients and 2.5 (1.0-8.0) for the trigger positive patients. Male to female ratio was 352:409 and 113:129 for all patients and the trigger positive patients, respectively.

We identified 48 incidents of harm, representing 21 harm events per 1000 patient days and 6 harm events per 100 consultations. The distribution of the 48 patients with identified harm according to status as admitted or outpatient, as well as their distribution across specialties are presented in Table 2. 60.4% of the harm events were in the pediatric (medical) patients, whereas 22.9% occurred in ENT-patients, 10.4% in orthopedic and 6.3% in general surgical patients.

Harm was detected in 5% of all pediatric contacts with a slightly higher rate of 7% in pediatric admissions. The incidence of harm in all contacts including surgical and ENT patients and in admissions only regardless of specialty was similar, 6.3% and 8.3%, respectively.

All, but two identified harm events were categorized as harm category F, 'Temporary harm to the patient and required initial or prolonged hospitalization'. Examples of harm were postoperative pericarditis, ileus after gastrostomy, candida stomatitis after treatment with antibiotics, infection in percutaneous endoscopic gastrostomy, bleeding following placement of nasogastric feeding tube (harm category E) and nosocomial infection (gastroenteritis, pneumonia) for the pediatric patients. In orthopedic patients osteomyelitis after pinning of Bennett's fracture was found and in general surgical patients hematoma after hernia operation (outpatient: harm category E) was found. In the ENT patients bleeding, infection and/or dehydration following adenotonsillectomy were recurring harms.

### Voluntary incidence reports

About two thirds of the incidents reported were minor incidents like delay in medication administration not leading to patient harm.

Patient harm as defined by the PTT user guide was found in 51/160 (30.9%) of the incidence reports 2010-2012. 37 harm events were classified as harm category E, 8



1  
2  
3 category F, 3 category G, 1 category H and 2 category I. This equals 51/5854 (total  
4 number of patients admitted acutely with medical diagnoses 2010-2012) = 0.9%. Only  
5 three of these incidents were reported in the PTT study months giving a voluntary  
6 reported harm rate of 3/584 (number of pediatric patients in the PTT screening) =  
7 0.5% in March-May 2011.  
8  
9

10  
11 Patient harm reported through the incidence reporting system included unexpected  
12 patient death; fall injury; pain and swelling from subcutaneous peripheral venous  
13 catheter; complications to procedure; anaphylactic drug reactions; and prolonged  
14 hospitalization due to errors in medication and fluid administration.  
15  
16  
17

### 18 19 20 **Triggers**

21  
22 We identified one or more out of 20 of the 39 NHS triggers in 242 (31.8%) of all  
23 patient contacts. In 71.5% of the trigger positive contacts only one trigger was found.  
24 The highest number of triggers found in a patient contact was 4. The mean rate of  
25 triggers per patient was 1.4.  
26  
27  
28

29  
30 The most frequently found trigger was readmission within 30 days. Common reasons  
31 for unplanned readmission were surgical site infection, recurrent (respiratory tract)  
32 infections, postoperative bleeding and seizures. We found the second most common  
33 trigger in our screening to be hypoxia, but no patient harm was associated with this  
34 specific trigger.  
35  
36  
37

38  
39 Of the 242 trigger positive contacts, 177 (73.1%) were admissions and 65 (26.9%)  
40 acute outpatient visits. Table 2 shows how trigger positive admissions and outpatient  
41 contacts were distributed across specialties.  
42  
43

44  
45 The PPV of one or more triggers for identifying harm was 19.8%. When calculations  
46 were made for admissions (n= 761) and outpatient care (n= 242) separately, PPV was  
47 23.2% and 10.8%, respectively (p=0.03). When we looked at the PPV of individual  
48 triggers, PPV varied from zero in the case of hypoxia, thrombocytopenia and  
49 electrolyte abnormalities to 100% in the case of surgical site infection and nosocomial  
50 pneumonia (Table 3).  
51  
52  
53

54  
55 Table 4 shows rate of trigger positive contacts, rate of harm and PPV of triggers  
56 across specialties.  
57  
58  
59  
60

## DISCUSSION

This is the first report about use of a PTT in a European unit. Despite the fact that only half of the NHS pediatric triggers were found in the patient records screened in this study, we identified a ten times higher harm rate using the PTT than what was reported in the department's voluntary incidence reports in the same period. Patient harm identified through incidence report analysis and PTT screening was different in number and character in our unit.

Our pediatric centre is the largest acute pediatric unit in Norway, but we do not have a PICU in our hospital. Therefore, we do not treat the most severely ill children, and we only rarely use potent anesthesia medications. This may be one of the reasons why half of the NHS triggers were not found in our review, reflecting that some diagnoses and interventions with a high incidence of complications are not present in the children and adolescents in our unit.

In the recently published Canadian Pediatric Adverse Events Study, the incidence, type and severity of harm among children admitted to academic pediatric centers were compared with those admitted to community hospitals in Canada.[8] In that study, significantly more patient records from academic pediatric centers (38.8%) than from community hospitals (21.6%) were trigger-positive.[8] We found triggers in 31.8% of our patients. The overall rate of harm in the Canadian study was 9.2% with significantly more harm in academic pediatric centers (11.2%) than in community hospitals (3.3%). We found a total rate of harm in admitted children of 8.3%. These results might reflect that, although being an academic teaching unit, our center probably has a patient population with disease severity and complexity somewhere in between the two compared unit levels in the Canadian study.

Kirkendall et al.[7] found 37 harm events per 100 patients and 76 harm events per 1000 patient-days, a significantly higher rate than in our patients. One of the reasons for this may be that the study was conducted in a large US tertiary centre where 32.5% of the patients went to the operating room during their hospital stay and 13.3% were admitted to an ICU during part of or whole stay.

We found a PPV of one or more triggers of 19.8% when both acute outpatient contacts and admissions were included and a higher PPV when only admissions were

1  
2  
3 analyzed. Lemon and Stockwell found a PPV of 34%.[6] One of the possible reasons  
4 for this difference is that Lemon and Stockwell only screened for 11 triggers while we  
5 identified 20 different triggers, of which some had an individual PPV of zero. Another  
6 important difference is that Lemon and Stockwell reported results from a four-year  
7 period whereas we only screened for a three-month period, which limits  
8 generalizability.  
9

10  
11 Like Kirkendall et al.,[7] we found that some modules, in particular the laboratory  
12 module, contained adult-oriented triggers like high INR and diagnostic imaging for  
13 embolus that were not identified in our chart review. Removal of unnecessary triggers  
14 would reduce the overall number of triggers that reviewers must consider. Hypoxia,  
15 electrolyte abnormalities and thrombocytopenia had a PPV of zero and may not be  
16 worthwhile screening for in our patient population. However, bearing in mind the  
17 short study period of 3 months, further studies, ideally multicenter studies are needed  
18 before abolishment of some triggers.  
19

20  
21 To our knowledge, we are the first group to report the use of a PTT for unplanned  
22 outpatient visits. Some trigger tools exist for outpatient care,[11,12] however they are  
23 not suitable for children and adolescents. As harm was detected in 7/267 (2.6%) of  
24 acute outpatient visits, we believe that identification of these events is important in a  
25 unit like ours where the number of acute outpatient visits is substantial.  
26

27  
28 Regardless, there seems to be a higher PPV of triggers in surgical patients, but the rate  
29 of harm was comparable across medical and surgical patients (5-6%), excluding ENT  
30 patients with a 35% total harm rate.  
31

32  
33 Needless to say, the extent to which trigger tools detect harm as intended depends to a  
34 large extent on routines for documentation. Like Kirkendall et al.,[7] we noticed that  
35 frequently occurring complications like complications to peripheral venous catheters,  
36 e.g. phlebitis, subcutaneous edema, tissue necrosis and infection, are infrequently  
37 documented in the records of the patients in our unit. The same applies to the  
38 incidence reporting system that contains information about only a small fraction of  
39 these types of patient harm. Hence, certain types of patient harm that are frequently  
40 occurring and should be targeted by interventions are not detected in their full extent  
41 neither with the PTT nor through voluntary incidence reporting.  
42  
43  
44  
45  
46  
47  
48  
49  
50  
51  
52  
53  
54  
55  
56  
57  
58  
59  
60

### Limitations of the study

The PTT screening and incident report analyses were performed by only one investigator, and inter-rater agreement could not be assessed in this study. The judgment regarding whether harm was present and how severe was left to one person, with no one to validate the findings. To our knowledge, the PTT is not established in any Norwegian pediatric unit, and we did not succeed in finding a person with both time and experience to validate the findings. For the same reason, this was a relatively small single-center study and the study period was short. Some of the triggers that were not identified during the three study months could possibly have been detected if we screened for a longer period. The decision to also screen unplanned outpatient contacts as well as including all sodium and potassium levels out of range were deviations from the PTT user guide that could potentially bias our results. However, as the outpatient contacts and admissions are to a large extent reported separately, and as the sodium and potassium trigger did not predict harm in any of our patients, we believe that these factors did not influence the main conclusions of the study. Generalizability of our results may be limited to settings with similar organization of specialist healthcare including referral practices. However, it is important that utility studies performed in various patient groups be published in order for clinicians to judge applicability of the results to their practice.

## CONCLUSION

Using the NHS Paediatric Trigger tool we found a rate of trigger positive contacts and a rate of harm comparable to an extensive Canadian review. The PTT made us able to detect more and different types of harm among our children and adolescents than what we detect by our routine system for reporting patient harm.

The presence of adult-oriented triggers, triggers that were not identified at all, as well as triggers with a low predictive value for harm, indicate a need for modification of trigger tools to the setting in which they are intended to be used. The NHS PTT, with certain modifications can, as a supplement to voluntary incidence reporting, be used to calculate the rate of harm and identify areas of care where most harm events are occurring. Hence, it may inform priorities for action and track improvements over time.

**ACKNOWLEDGEMENT**

The authors wish to thank Gunnvor Flaa Marum in the AHUS GTT team for assisting in the PTT screening.

**FUNDING**

None

**CONTRIBUTOR STATEMENT**

ALS was the lead author for this paper and involved in all stages including design of the research, acquisition of data, analysis and interpretation of the data and statistical analysis. BN contributed to the drafting of the manuscript, critical revision of the manuscript and supervision.

**COMPETING INTEREST**

None

**DATA SHARING STATEMENT**

No additional data available

**REFERENCES**

1. Kohn LT, Corrigan J, Donaldson MS (2000) To err is human : building a safer health system. Washington, D.C.: National Academy Press. xxi, 287 p. p.
2. Leape LL, Woods DD, Hatlie MJ, et al. Promoting patient safety by preventing medical error. JAMA 1998;280: 1444-1447.
3. Layde PM, Cortes LM, Teret SP, et al. Patient safety efforts should focus on medical injuries. JAMA 2002;287: 1993-1997.
4. NHS Institute for Innovation and Improvement (2010) The Paediatric Trigger Tool User Guide. Coventry: NHS Institute for Innovation and Improvement.
5. Griffin F RR (2009) IHI Global Trigger Tool for measuring adverse events. Cambridge, Massachusetts.
6. Lemon V, Stockwell DC. Automated detection of adverse events in children. Pediatr Clin North Am 2012;59: 1269-1278.
7. Kirkendall ES, Kloppenborg E, Papp J, et al. Measuring adverse events and levels of harm in pediatric inpatients with the Global Trigger Tool. Pediatrics 2012;130: e1206-1214.
8. Matlow AG, Baker GR, Flintoft V, et al. Adverse events among children in Canadian hospitals: the Canadian Paediatric Adverse Events Study. CMAJ 2012;184: E709-718.
9. Solevag AL, Eggen EH, Schroder J, et al. Use of a modified pediatric early warning score in a department of pediatric and adolescent medicine. PLoS One 2013;8: e72534.
10. National Coordinating Council for Medication Error Reporting and Prevention (NCC MERP) (1996, revised 2001) National Coordinating Council for Medication Error Reporting and Prevention (NCC MERP) Taxonomy of Medication Errors; Available at <http://www.NCCMERP.org>.
11. Gandhi TK, Seger AC, Overhage JM, et al. Outpatient adverse drug events identified by screening electronic health records. J Patient Saf 2010;6: 91-96.
12. NHS Institute for Innovation and Improvement (2011) IHI Outpatient Adverse Event Trigger Tool. In: Improvement IfH, editor. Cambridge.

Table 1 The Paediatric Trigger Tool (PTT) items as depicted in the NHS PTT User Guide[4]

|                       | <b>Item</b>                                                              |
|-----------------------|--------------------------------------------------------------------------|
| <b>General care</b>   | PG1 Early warning score                                                  |
|                       | PG2 Tissue damage or pressure ulcer                                      |
|                       | PG3 Readmission within 30 days                                           |
|                       | PG4 Unplanned admission                                                  |
|                       | PG5 Abnormal cranial imaging                                             |
|                       | PG6 Respiratory or cardiac arrest / crash calls                          |
|                       | PG7 Diagnostic imaging for embolus / thrombus +/- confirmation           |
|                       | PG8 Complication of procedure or treatment                               |
|                       | PG9 Transfer to higher level of care                                     |
|                       | PG10 Hypoxia O2 sat <85%                                                 |
|                       | PG11 Cancelled elective procedure / delayed discharge                    |
| <b>Surgical care</b>  | PS1 Return to theatre                                                    |
|                       | PS2 Change in planned procedure                                          |
|                       | PS3 Surgical site infection or hospital acquired urinary tract infection |
|                       | PS4 Removal/injury/repair of organ                                       |
| <b>Intensive care</b> | IP1 Readmission to Intensive Care or High Dependency Care                |
| <b>Medication</b>     | PM1 Vitamin K (except for routine dose in neonates)                      |
|                       | PM2 Naloxone                                                             |
|                       | PM3 Flumazenil (Romazicon)                                               |
|                       | PM4 Glucagon or glucose $\geq 10\%$                                      |
|                       | PM5 Chlorphenamine or antihistamine                                      |
|                       | PM6 Anti-emetics                                                         |
|                       | PM7 IV Bolus $\geq 10\text{ml/kg}$ colloid or crystalloid given          |
|                       | PM8 Abrupt medication stop                                               |
| <b>Lab test</b>       | PL15 Thrombocytopenia (platelets <100)                                   |
|                       | PL1 High INR >5 or aPTT >100                                             |
|                       | PL2 Transfusion                                                          |
|                       | PL3 Abrupt drop in Hb or Hct (>25%)                                      |
| <b>Biochemistry</b>   | PL4 Rising urea or creatinine (>2x baseline)                             |
|                       | PL5/PL6 Electrolyte abnormalities (Na+ <130 or >150, K+ <3.0 or >6.0)    |
|                       | PL7 Hypoglycemia (<3mmol/l)                                              |
|                       | PL8 Hyperglycemia (>12mmol/l)                                            |
|                       | PL9 Drug level out of range                                              |
| <b>Microbiology</b>   | PL10 MRSA bacteraemia                                                    |
|                       | PL11 C. difficile                                                        |
|                       | PL12 Vanc resistant enterococcus (VRE)                                   |
|                       | PL13 Nosocomial pneumonia                                                |
|                       | PL14 Positive blood culture                                              |
| <b>Other</b>          | PO1 Other event                                                          |



Table 2 Distribution of trigger positive admissions and outpatient contacts across specialties

|                        | Pediatric |            | Ortopedic |            | General surgical |            | Ear, nose and throat |            |
|------------------------|-----------|------------|-----------|------------|------------------|------------|----------------------|------------|
|                        | Admitted  | Outpatient | Admitted  | Outpatient | Admitted         | Outpatient | Admitted             | Outpatient |
| Total n (%)            | 356 (47)  | 228 (30)   | 70 (9)    | 13 (2)     | 41 (5)           | 22 (3)     | 27 (3.5)             | 4 (0.5)    |
| Trigger positive n (%) | 148 (61)  | 59 (24.5)  | 8 (3.5)   | 3 (1)      | 10 (4)           | 2 (1)      | 11 (4.5)             | 1 (0.5)    |
| Harm n                 | 26        | 3          | 3         | 2          | 1                | 2          | 11                   | 0          |

Table 3 The triggers we identified in our study are presented with positive predictive value (PPV) with 95% confidence interval (CI) for identifying harm. The numerator represents number of harm events and the denominator how many times each individual trigger was found in all patient contacts (n=761)

|                       | Item                                                                     | PPV (CI)%        |
|-----------------------|--------------------------------------------------------------------------|------------------|
| <b>General care</b>   | PG1 Early warning score                                                  |                  |
|                       | PG2 Tissue damage or pressure ulcer                                      |                  |
|                       | PG3 Readmission within 30 days                                           | 24/175=14 (9-20) |
|                       | PG4 Unplanned admission                                                  |                  |
|                       | PG5 Abnormal cranial imaging                                             |                  |
|                       | PG6 Respiratory or cardiac arrest / crash calls                          | 0/1=0 (0-95)     |
|                       | PG7 Diagnostic imaging for embolus / thrombus +/- confirmation           | 1/2=50 (3-97)    |
|                       | PG8 Complication of procedure or treatment                               | 17/23=74 (51-89) |
|                       | PG9 Transfer to higher level of care                                     | 3/22=14 (4-36)   |
|                       | PG10 Hypoxia O2 sat <85%                                                 | 0/25=0 (0-17)    |
|                       | PG11 Cancelled elective procedure / delayed discharge                    | 1/1=100 (5-100)  |
| <b>Surgical care</b>  | PS1 Return to theatre                                                    | 1/1=100 (5-100)  |
|                       | PS2 Change in planned procedure                                          |                  |
|                       | PS3 Surgical site infection or hospital acquired urinary tract infection | 6/6=100 (52-100) |
|                       | PS4 Removal/injury/repair of organ                                       |                  |
| <b>Intensive care</b> | IP1 Readmission to Intensive Care or High Dependency Care                |                  |
| <b>Medication</b>     | PM1 Vitamin K (except for routine dose in neonates)                      |                  |
|                       | PM2 Naloxone                                                             |                  |
|                       | PM3 Flumazenil (Romazicon)                                               |                  |
|                       | PM4 Glucagon or glucose $\geq 10\%$                                      |                  |
|                       | PM5 Chlorphenamine or antihistamine                                      | 0/1=0 (0-95)     |
|                       | PM6 Anti-emetics                                                         |                  |
|                       | PM7 IV Bolus $\geq 10\text{ml/kg}$ colloid or crystalloid given          | 3/19=16 (4-40)   |
|                       | PM8 Abrupt medication stop                                               |                  |
| <b>Lab test</b>       | PL15 Thrombocytopenia (platelets <100)                                   | 0/7=0 (0-44)     |
|                       | PL1 High INR >5 or aPTT >100                                             |                  |
|                       | PL2 Transfusion                                                          | 2/8=25 (4-64)    |
|                       | PL3 Abrupt drop in Hb or Hct (>25%)                                      | 2/8=25 (4-64)    |
| <b>Biochemistry</b>   | PL4 Rising urea or creatinine (>2x baseline)                             | 0/1=0 (0-95)     |
|                       | PL5/PL6 Electrolyte abnormalities (Na+ <130 or >150, K+ <3.0 or >6.0)    | 0/12=0 (0-30)    |
|                       | PL7 Hypoglycemia (<3mmol/l)                                              | 3/8=38 (10-74)   |
|                       | PL8 Hyperglycemia (>12mmol/l)                                            | 0/1=0 (0-95)     |
|                       | PL9 Drug level out of range                                              |                  |
| <b>Microbiology</b>   | PL10 MRSA bacteraemia                                                    |                  |
|                       | PL11 C. difficile                                                        |                  |
|                       | PL12 Vanc resistant enterococcus (VRE)                                   |                  |
|                       | PL13 Nosocomial pneumonia                                                | 2/2=100 (20-100) |
|                       | PL14 Positive blood culture                                              | 1/1=100 (5-100)  |
| <b>Other</b>          | PO1 Other event                                                          |                  |

Table 4 Rate of trigger positive contacts, rate of harm and positive predictive value (PPV) of positive triggers across specialties

| Specialty            | Rate of trigger positive contacts | Rate of harm  | PPV   |
|----------------------|-----------------------------------|---------------|-------|
| Pediatric            | 207/584 (35.4%)                   | 29/584 (5.0%) | 14%   |
| Orthopedic surgery   | 11/83 (13.3%)                     | 5/83 (6.0%)   | 45.5% |
| General surgery      | 12/63 (19.0%)                     | 3/63 (4.8%)   | 25%   |
| Ear, Nose and Throat | 12/31 (38.7%)                     | 11/31 (35.5%) | 91.7% |
| Total                | 242/761 (31.8%)                   | 48/761 (6.3%) | 19.8% |

1  
2  
3  
4  
5  
6  
7 Title: Utility of a Pediatric Trigger Tool in a Norwegian Department of Pediatric and  
8 Adolescent Medicine  
9

10  
11  
12  
13  
14  
15  
16  
17 Authors:

18 Anne Lee Solevåg<sup>1</sup>

19  
20  
21 Britt Nakstad<sup>1,2</sup>  
22  
23  
24

25  
26 <sup>1</sup>The Department of Pediatric and Adolescent Medicine, Akershus University  
27 Hospital, 1478 Lørenskog, Norway  
28

29 <sup>2</sup>Institute of Clinical Medicine, University of Oslo, Oslo, Norway  
30  
31  
32

33 Corresponding author:

34  
35 Anne Lee Solevåg (MD, PhD), The Department of Pediatric and Adolescent  
36 Medicine, Akershus University Hospital, 1478 Lørenskog, Norway  
37  
38

39 Tlph: +47 67964520/+47 41469314, Fax: +47 67960900  
40  
41

42 E-mail: [a.l.solevag@medisin.uio.no](mailto:a.l.solevag@medisin.uio.no)  
43  
44  
45  
46  
47

48 | Keywords: [Paediatrics](#)[Pediatrics](#), Quality in health care  
49  
50

51  
52 | Word count of abstract: 299  
53

Word count: [29973022](#)  
54  
55  
56  
57  
58  
59  
60

## ABSTRACT

### Objectives

The British National Health Service (NHS) Paediatric Trigger Tool (PTT) was made based on various trigger tools developed for use in adults. The PTT has not previously been developed or used in Nordic units. We aimed to compare harm identified through PTT screening with voluntary incidence reports in our department. A secondary aim was to assess utility of the different triggers, including predictive value for identifying harm. We hypothesized that the NHS PTT would need adjustments for the setting in which it is used.

### Setting

A Norwegian level II department of pediatric and adolescent medicine.

### Participants

A convenience sample of 761 acute medical and surgical patient contacts March-May 2011. Median age (IQR) for the trigger positive patients was 2.5 (1.0-8.0) years; range 0-18 years.

### Primary and secondary outcome measures

The type and rate of identified harm compared to the department's voluntary incidence reports. The type and rate of identified triggers and positive predictive value for harm.

### Results

The PTT revealed a harm rate of 5% for medical patients, as compared to 0.5% in the incidence reports the same months. PTT screening revealed other types of harm than those reported by health care personnel themselves. We identified only 20 out of the 39 NHS PTT triggers. The most frequent trigger was re-admission within 30 days. Hypoxia, which was the second most frequent trigger, did not predict any patient harm.

### Conclusion

This study showed that the NHS PTT identifies more and other types of harm than voluntary incidence reports. The presence of adult-oriented triggers, triggers that were

1  
2  
3  
4  
5  
6 not identified at all, as well as triggers with a low predictive value for harm may  
7 indicate the need for modification of the PTT to different settings. More studies are  
8 needed before a final decision is made to exclude triggers from the screening.  
9  
10

## 11 12 13 **ARTICLE SUMMARY**

### 14 15 Strengths and limitations of this study

- 16  
17 ○ There is a limited understanding of how structured patient safety work in  
18 pediatrics can be performed
- 19  
20 ○ We investigated utility of The British National Health Service Paediatric  
21 Trigger Tool (PTT) in a level II pediatric unit and found that the tool should  
22 probably be modified to different settings
- 23  
24 ○ Previous to this study, only one major pediatric trigger tool has been published  
25 in peer review journal format and none have been applied in outpatient  
26 settings
- 27  
28 ○ This review is based on a significant amount of patient data. However, the  
29 single-center character and the short study period call for additional studies,  
30 preferentially multicenter studies  
31  
32  
33  
34  
35  
36  
37  
38  
39  
40  
41  
42  
43  
44  
45  
46  
47  
48  
49  
50  
51  
52  
53  
54  
55  
56  
57  
58  
59  
60

## INTRODUCTION

By identifying recurring medical errors focused efforts can be made to improve patient safety.[1,2] However, medical errors do not always lead to harm to the patient. Patient harm can be caused by medical error, but can also occur as a result of a diagnostic or treatment procedure in the absence of a medical error.[3]

So-called ‘trigger tools’ focus on patient harm, not errors, and can in combination with more traditional incident reporting in healthcare help departments and hospitals focus their improvement work to reduce the overall rate of patient harm.[4] The global trigger tool (GTT) is a retrospective method for detecting iatrogenic harm [5] and has been used as a benchmarking system and means for monitoring change over time. A trigger has been defined as data present in the patient record that can directly or indirectly, by providing a clue for further investigation, represent an adverse event that caused patient harm.[6,7] The GTT has become a widely used tool in patient safety work. However, the understanding of health care–associated harm in children is limited as compared to adults and only recently a comprehensive pediatric trigger tool has been developed.[8]

The National Health Service (NHS) Paediatric Trigger Tool (PTT) was made based on various trigger tools for use in adults with the support of clinicians in nine UK hospitals, and was meant to be useful for district general hospitals, acute teaching hospitals and specialist pediatric centers.[4] However, there is a need for determining utility of such instruments derived from adult care in different institutions and patient groups. The items comprising the PTT should be piloted in different settings in order to remove unnecessary or adult-oriented triggers and/or add more relevant triggers.[7]

Hence, we aimed to examine utility of the NHS PTT in a large Nordic department of pediatrics and if needed adjust the tool for use in our patients.

Our primary focus was to examine if or to which extent the PTT detected patient harm in medical and surgical patients in our department and compare these results with voluntary incidence reports. A secondary aim was to assess utility of the different triggers, including predictive value of individual triggers for identifying harm.

## METHODS

The study was approved as part of quality improvement activities by the institutional review board at Akershus University Hospital (AHUS)

### Setting

AHUS is located outside the Norwegian capital Oslo. The hospital is the single largest acute hospital in Norway and offers a full range of medical services except cardiac- and neurosurgery, as well as treatment of severe traumatic injuries. AHUS does not have a pediatric intensive care unit (PICU), but transfers children below the age of [3](#) [three](#) years in need for intensive care to a nearby university hospital. Critically ill children between three and 18 years are treated in the intensive care unit (ICU) for adults in AHUS. The hospital introduced early warning scoring systems after this study. Routine GTT screening has been performed since 2007.

The Department of Pediatric and Adolescent Medicine is a 37-bed level II unit. Children and adolescents between zero and 18 years of age referred by general physicians for acute specialist care are examined in the children's emergency department (ED) and about 50% are admitted. Registration of patient harm in our unit is exclusively based on voluntary reporting through an electronic incidence reporting system called Extend Quality System (EQS).

### PTT screening

We did a manual review of unplanned patient visits to the children's ED using the NHS Paediatric Trigger Tool User guide.[4] For convenience, we included the visits that were documented for the purpose of evaluating the introduction of a pediatric early warning score in our department over a [3](#) [three](#) month period.[9] These visits represented 95% of all contacts in the children's ED in the study months. Pediatric (medical), as well orthopedic, general surgical; and ear, nose and throat (ENT) patients below the age of 18 years were included and the results were recorded in Excel spreadsheets (Microsoft Excel 2008 for Mac (Redmond, WA, US)).

The PTT screening was performed by the primary investigator (ALS) who is a consultant pediatrician in the department. Because AHUS is the first hospital in Norway to screen for pediatric triggers, there are no courses or formal training in the



1  
2  
3  
4  
5  
6 PTT available in Norway. Hence, to get a general idea about the concept of trigger  
7 tools, ALS attended a full-day course in the GTT organized by The Norwegian  
8 Knowledge Centre for the Health Services. In addition, she received instructions from  
9 the GTT team at AHUS based on their review methodology and PTT screening of 10  
10 patient records was performed in collaboration with a representative from the GTT  
11 team.  
12  
13  
14

15 The PTT consists of 39 items described in Table 1. The patient records were reviewed  
16 in the following order: Diagnoses and treatment procedures, discharge summaries,  
17 medication charts, laboratory results, operation notes, nurse notes, physician notes and  
18 admission note. Because only half of the acute referrals result in an admission, our  
19 practice differs from most medical departments for adults where a larger proportion of  
20 acutely referred patients are being admitted. The PTT user guide dictates a minimum  
21 length of stay of 8 hours.[4] However, as we argue that our threshold for admitting  
22 patients from the children's ED is high with often only slight differences in disease  
23 severity and complexity between those who are admitted and those who are not, we  
24 included also acute outpatient visits in our screening. [FurtherIn our unit fluid  
25 replacement therapy has been an area of improvement. In an attempt to increase  
26 detection rates for harm causes by intravenous fluid therapy](#), we chose to register all  
27 patient contacts with the diagnoses hypo-/hyperkalemia and/or hypo-/hyponatremia  
28 as trigger positive regardless of the definitions used in the PTT user guide for these  
29 triggers (Table 1). Otherwise, we strictly followed the definitions and guidelines  
30 outlined in the user guide.  
31  
32  
33  
34  
35  
36  
37  
38  
39

40 The PTT uses an adapted version of the National Coordinating Council for  
41 Medication Error Reporting and Prevention (NCC MERP) 'Index for Categorizing  
42 Errors'. [10] The rationale for this is that the NHS focuses on adverse events that  
43 cause actual patient harm and not medical errors that have a potential for patient  
44 harm. Therefore, only the NCC MERP categories E through I are included:  
45 Temporary harm to the patient and required intervention (category E), temporary  
46 harm to the patient and required initial or prolonged hospitalization (category F),  
47 permanent patient harm (category G), intervention required to sustain life (category  
48 H), and patient death (category I).  
49  
50  
51  
52  
53  
54  
55  
56  
57  
58  
59  
60

1  
2  
3  
4  
5  
6 Harm identified through PTT screening was compared to harm identified through  
7 voluntary incidence reports in the department.  
8

### 9 10 **Voluntary incidence reporting**

11 ALS read and classified patient related incidents regarding pediatric (medical)  
12 patients reported in the EQS in March until May 2011. The rate of harm reported in  
13 incidence reports during these three months was low. Therefore all reports in an  
14 extended period of time, 2010-2012, were included. Patient harm identified in the  
15 incidence reports was classified from E through I for comparison to the findings from  
16 the PTT screening.  
17  
18  
19  
20

### 21 **Statistical analyses**

22 Data were analyzed using PASW<sup>®</sup> Statistics 18.0 software (SPSS Inc., Chicago, IL).  
23 Comparisons between groups were made using the Chi-square test for categorical  
24 variables and Mann-Whitney *U* test for continuous variables. P-values <0.05 were  
25 considered significant. Positive predictive value (PPV) with 95% confidence interval  
26 (CI) for triggers was calculated and we calculated number of harm events per 1000  
27 patient days and 100 patient contacts.  
28  
29  
30  
31  
32  
33  
34  
35  
36  
37  
38  
39  
40  
41  
42  
43  
44  
45  
46  
47  
48  
49  
50  
51  
52  
53  
54  
55  
56  
57  
58  
59  
60

## RESULTS

From March 15<sup>th</sup> until Mai 31<sup>st</sup> 2011 761 patient records, representing 2268 patient days were screened for triggers. Median age (IQR) in years was 3.5 (1.2-11.0) for all patients and 2.5 (1.0-8.0) for the trigger positive patients. Male to female ratio was 352:409 and 113:129 for all patients and the trigger positive patients, respectively.

We identified 48 incidents of harm, representing 21 harm events per 1000 patient days and 6 harm events per 100 consultations. The distribution of the 48 patients with identified harm according to status as admitted or outpatient, as well as their distribution across specialties are presented in Table 2. 60.4% of the harm events were in the pediatric (medical) patients, whereas 22.9% occurred in ENT-patients, 10.4% in orthopedic and 6.3% in general surgical patients.

Harm was detected in 5% of all pediatric contacts with a slightly higher rate of 7% in pediatric admissions. The incidence of harm in all contacts including surgical and ENT patients and in admissions only regardless of specialty was similar, 6.3% and 8.3%, respectively.

All, but two identified harm events were categorized as harm category F, 'Temporary harm to the patient and required initial or prolonged hospitalization'. Examples of harm were postoperative pericarditis, ileus after gastrostomy, candida stomatitis after treatment with antibiotics, infection in percutaneous endoscopic gastrostomy, bleeding following placement of nasogastric feeding tube (harm category E) and nosocomial infection (gastroenteritis, pneumonia) for the pediatric patients. In orthopedic patients osteomyelitis after pinning of Bennett's fracture was found and in general surgical patients hematoma after hernia operation (outpatient: harm category E) was found. In the ENT patients bleeding, infection and/or dehydration following adenotonsillectomy were recurring harms.

### Voluntary incidence reports

1  
2  
3  
4  
5  
6 About two thirds of the incidents reported were minor incidents like delay in  
7 medication administration not leading to patient harm.  
8

9  
10 Patient harm as defined by the PTT user guide was found in 51/160 (30.9%) of the  
11 incidence reports 2010-2012. 37 harm events were classified as harm category E, 8  
12 category F, 3 category G, 1 category H and 2 category I. This equals 51/5854 (total  
13 number of patients admitted acutely with medical diagnoses 2010-2012) = 0.9%. Only  
14 three of these incidents were reported in the PTT study months giving a voluntary  
15 reported harm rate of 3/584 (number of pediatric patients in the PTT screening) =  
16 0.5% in March-May 2011.  
17  
18  
19

20  
21 Patient harm reported through the incidence reporting system included unexpected  
22 patient death; fall injury; pain and swelling from subcutaneous peripheral venous  
23 catheter; complications to procedure; anaphylactic drug reactions; and prolonged  
24 hospitalization due to errors in medication and fluid administration.  
25  
26

### 27 **Triggers**

28  
29 We identified one or more out of 20 of the 39 NHS triggers in 242 (31.8%) of all  
30 patient contacts. In 71.5% of the trigger positive contacts only one trigger was found.  
31 The highest number of triggers found in a patient contact was 4. The mean rate of  
32 triggers per patient was 1.4.  
33  
34  
35

36 The most frequently found trigger was readmission within 30 days. Common reasons  
37 for unplanned readmission were surgical site infection, recurrent (respiratory tract)  
38 infections, postoperative bleeding and seizures. We found the second most common  
39 trigger in our screening to be hypoxia, but no patient harm was associated with this  
40 specific trigger.  
41  
42  
43

44 Of the 242 trigger positive contacts, 177 (73.1%) were admissions and 65 (26.9%)  
45 acute outpatient visits. Table 2 shows how trigger positive admissions and outpatient  
46 contacts were distributed across specialties.  
47  
48

49 The PPV of one or more triggers for identifying harm was 19.8%. When calculations  
50 were made for admissions (n= 761) and outpatient care (n= 242) separately, PPV was  
51 23.2% and 10.8%, respectively (p=0.03). When we looked at the PPV of individual  
52 triggers, PPV varied from zero in the case of hypoxia, thrombocytopenia and  
53  
54  
55  
56  
57  
58  
59  
60

1  
2  
3  
4  
5  
6 electrolyte abnormalities to 100% in the case of surgical site infection and nosocomial  
7 pneumonia (Table 3).  
8

9  
10 Table 4 shows rate of trigger positive contacts, rate of harm and PPV of triggers  
11 across specialties.  
12

### 13 **DISCUSSION**

14  
15 This is the first report about use of a PTT in a European unit. Despite the fact that  
16 only half of the NHS pediatric triggers were found in the patient records screened in  
17 this study, we identified a ten times higher harm rate using the PTT than what was  
18 reported in the department's voluntary incidence reports in the same period. Patient  
19 harm identified through incidence report analysis and PTT screening was different in  
20 number and character in our unit.  
21  
22  
23  
24

25 Our pediatric centre is the largest acute pediatric unit in Norway, but we do not have a  
26 PICU in our hospital. Therefore, we do not treat the most severely ill children, and we  
27 only rarely use potent anesthesia medications. This may be one of the reasons why  
28 half of the NHS triggers were not found in our review, reflecting that some diagnoses  
29 and interventions with a high incidence of complications are not present in the  
30 children and adolescents in our unit.  
31  
32  
33  
34

35 In the recently published Canadian Pediatric Adverse Events Study, the incidence,  
36 type and severity of harm among children admitted to academic pediatric centers were  
37 compared with those admitted to community hospitals in Canada.[8] In that study,  
38 significantly more patient records from academic pediatric centers (38.8%) than from  
39 community hospitals (21.6%) were trigger-positive.[8] We found triggers in 31.8% of  
40 our patients. The overall rate of harm in the Canadian study was 9.2% with  
41 significantly more harm in academic pediatric centers (11.2%) than in community  
42 hospitals (3.3%). We found a total rate of harm in admitted children of 8.3%. These  
43 results might reflect that, although being an academic teaching unit, our center  
44 probably has a patient population with disease severity and complexity somewhere in  
45 between the two compared unit levels in the Canadian study.  
46  
47  
48  
49  
50

51  
52 Kirkendall et al.[7] found 37 harm events per 100 patients and 76 harm events per  
53 1000 patient-days, a significantly higher rate than in our patients. One of the reasons  
54 for this may be that the study was conducted in a large US tertiary centre where  
55  
56  
57  
58  
59  
60

1  
2  
3  
4  
5  
6 32.5% of the patients went to the operating room during their hospital stay and 13.3%  
7 were admitted to an ICU during part of or whole stay.  
8

9  
10 We found a PPV of one or more triggers of 19.8% when both acute outpatient  
11 contacts and admissions were included and a higher PPV when only admissions were  
12 analyzed. Lemon and Stockwell found a PPV of 34%.<sup>[6]</sup> One of the possible reasons  
13 for this difference is that Lemon and Stockwell only screened for 11 triggers while we  
14 identified 20 different triggers, of which some had an individual PPV of zero. Another  
15 important difference is that Lemon and Stockwell reported results from a [four](#)-year  
16 period whereas we only screened for a three-month period, which limits  
17 generalizability.  
18  
19  
20  
21

22 Like Kirkendall et al.,<sup>[7]</sup> we found that some modules, in particular the laboratory  
23 module, contained adult-oriented triggers like high INR and diagnostic imaging for  
24 embolus that were not identified in our chart review. Removal of unnecessary triggers  
25 would reduce the overall number of triggers that reviewers must consider. Hypoxia,  
26 electrolyte abnormalities and thrombocytopenia had a PPV of zero and may not be  
27 worthwhile screening for in our patient population. However, bearing in mind the  
28 short study period of 3 months, further studies, ideally multicenter studies are needed  
29 before abolishment of some triggers.  
30  
31  
32  
33

34  
35 To our knowledge, we are the first group to report the use of a PTT for unplanned  
36 outpatient visits. Some trigger tools exist for outpatient care,<sup>[[11](#),[12](#),[13](#)]</sup> however they  
37 are not suitable for children and adolescents. As harm was detected in 7/267 (2.6%) of  
38 acute outpatient visits, we believe that identification of these events is important in a  
39 unit like ours where the number of acute outpatient visits is substantial.  
40  
41  
42

43 Regardless, there seems to be a higher PPV of triggers in surgical patients, but the rate  
44 of harm was comparable across medical and surgical patients (5-6%), excluding ENT  
45 patients with a 35% total harm rate.  
46  
47

48 Needless to say, the extent to which trigger tools detect harm as intended depends to a  
49 large extent on routines for documentation. Like Kirkendall et al.,<sup>[7]</sup> we noticed that  
50 frequently occurring complications like complications to peripheral venous catheters,  
51 e.g. phlebitis, subcutaneous edema, tissue necrosis and infection, are infrequently  
52 documented in the records of the patients in our unit. The same applies to the  
53  
54  
55  
56  
57  
58  
59  
60

1  
2  
3  
4  
5  
6 incidence reporting system that contains information about only a small fraction of  
7 these types of patient harm. Hence, certain types of patient harm that are frequently  
8 occurring and should be targeted by interventions are not detected in their full extent  
9 neither with the PTT nor through voluntary incidence reporting.  
10

### 11 12 **Limitations of the study**

13  
14 The PTT screening and incident report analyses were performed by only one  
15 investigator, and inter-rater agreement could not be assessed in this study. The  
16 judgment regarding whether harm was present and how severe was left to one person,  
17 with no one to validate the findings. To our knowledge, the PTT is not established in  
18 any Norwegian pediatric unit, and we did not succeed in finding a person with both  
19 time and experience to validate the findings. For the same reason, this was a relatively  
20 small single-center study and the study period was short. Some of the triggers that  
21 were not identified during the three study months could possibly have been detected if  
22 we screened for a longer period. The decision to also screen unplanned outpatient  
23 contacts as well as including all sodium and potassium levels out of range were  
24 deviations from the PTT user guide that could potentially bias our results. However,  
25 as the outpatient contacts and admissions are to a large extent reported separately, and  
26 as the sodium and potassium trigger did not predict harm in any of our patients, we  
27 believe that these factors did not influence the main conclusions of the study.  
28 Generalizability of our results may be limited to settings with similar organization of  
29 specialist healthcare including referral practices. However, it is important that utility  
30 studies performed in various patient groups be published in order for clinicians to  
31 judge applicability of the results to their practice.  
32  
33  
34  
35  
36  
37  
38  
39  
40  
41  
42  
43  
44  
45  
46  
47  
48  
49  
50  
51  
52  
53  
54  
55  
56  
57  
58  
59  
60

## CONCLUSION

Using the NHS Paediatric Trigger tool we found a rate of trigger positive contacts and a rate of harm comparable to an extensive Canadian review. The PTT made us able to detect more and different types of harm among our children and adolescents than what we detect by our routine system for reporting patient harm.

The presence of adult-oriented triggers, triggers that were not identified at all, as well as triggers with a low predictive value for harm, indicate a need for modification of trigger tools to the setting in which they are intended to be used. The NHS PTT, with certain modifications can, as a supplement to voluntary incidence reporting, be used to calculate the rate of harm and identify areas of care where most harm events are occurring. Hence, it may inform priorities for action and track improvements over time.

## ACKNOWLEDGEMENT

The authors wish to thank Gunnvor Flaa Marum in the AHUS GTT team for assisting in the PTT screening.

## CONTRIBUTOR STATEMENT

ALS was the lead author for this paper and involved in all stages including design of the research, acquisition of data, analysis and interpretation of the data and statistical analysis. BN contributed to the drafting of the manuscript, critical revision of the manuscript and supervision.

## FUNDING



1  
2  
3  
4  
5  
6  
7  
8  
9  
10  
11  
12  
13  
14  
15  
16  
17  
18  
19  
20  
21  
22  
23  
24  
25  
26  
27  
28  
29  
30  
31  
32  
33  
34  
35  
36  
37  
38  
39  
40  
41  
42  
43  
44  
45  
46  
47  
48  
49  
50  
51  
52  
53  
54  
55  
56  
57  
58  
59  
60

None

**DATA SHARING STATEMENT**

No additional data available

For peer review only

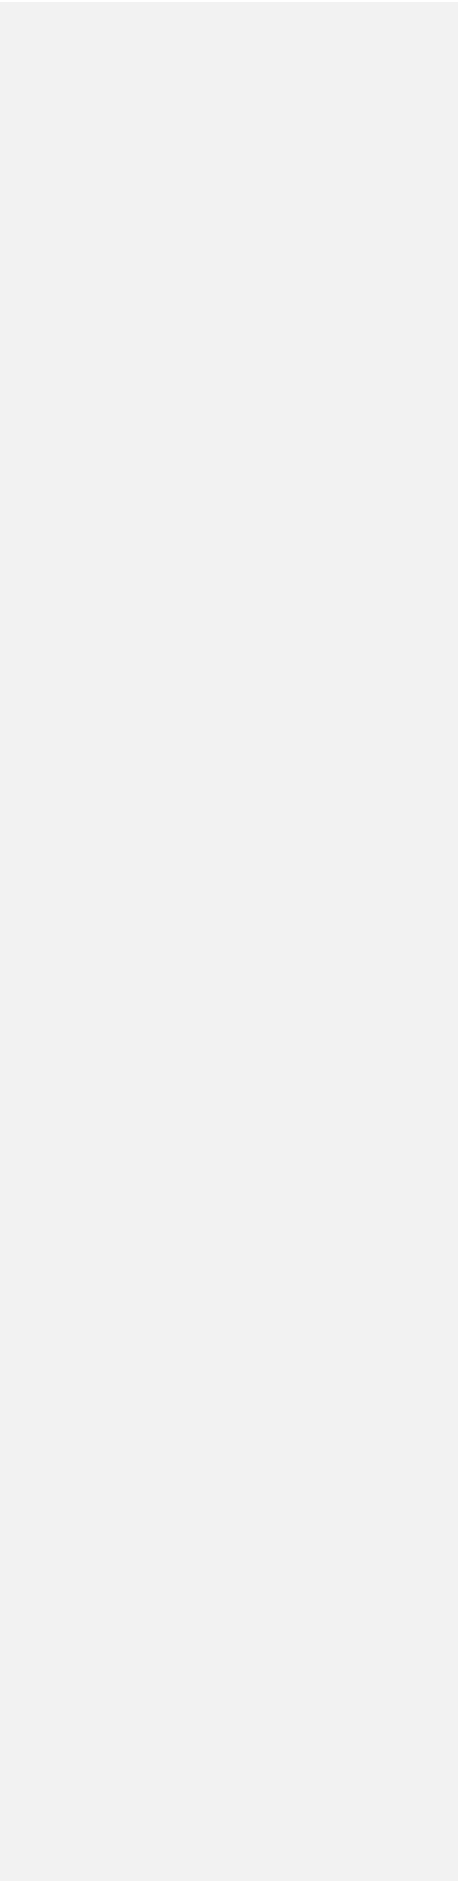

## REFERENCES

1. Kohn LT, Corrigan J, Donaldson MS (2000) To err is human : building a safer health system. Washington, D.C.: National Academy Press. xxi, 287 p. p.
2. Leape LL, Woods DD, Hatlie MJ, Kizer KW, Schroeder SA, et al. Promoting patient safety by preventing medical error. JAMA 1998;280:1444-1447.
3. Layde PM, Cortes LM, Teret SP, Brasel KJ, Kuhn EM, et al. Patient safety efforts should focus on medical injuries. JAMA 2002;287:1993-1997.
4. NHS Institute for Innovation and Improvement (2010) The Paediatric Trigger Tool User Guide. Coventry: NHS Institute for Innovation and Improvement.
5. Griffin F RR (2009) IHI Global Trigger Tool for measuring adverse events. Cambridge, Massachusetts.
6. Lemon V, Stockwell DC. Automated detection of adverse events in children. Pediatr Clin North Am 2012;59:1269-1278.
7. Kirkendall ES, Kloppenborg E, Papp J, White D, Frese C, et al. Measuring adverse events and levels of harm in pediatric inpatients with the Global Trigger Tool. Pediatrics 2012;130:e1206-1214.
8. Matlow AG, Baker GR, Flintoft V, Cochrane D, Coffey M, et al. Adverse events among children in Canadian hospitals: the Canadian Paediatric Adverse Events Study. CMAJ 2012;184:E709-718.
9. Solevag AL, Eggen EH, Schroder J, Nakstad B. Use of a modified pediatric early warning score in a department of pediatric and adolescent medicine. PLoS One 2013;8:e72534.
10. National Coordinating Council for Medication Error Reporting and Prevention (NCC MERP) (1996, revised 2001) National Coordinating Council for Medication Error Reporting and Prevention (NCC MERP) Taxonomy of Medication Errors; Available at <http://www.NCCMERP.org>.
11. ~~Griffin FA RR (2009) HI Global Trigger Tool for Measuring Adverse Events. Cambridge: Institute for Healthcare Improvement.~~
12. Gandhi TK, Seger AC, Overhage JM, Murray MD, Hope C, et al. Outpatient adverse drug events identified by screening electronic health records. J Patient Saf 2010;6:91-96.

Formatted: Font: Times New Roman, Font color: Black

1  
2  
3  
4  
5  
6 [13-12. NHS Institute for Healthcare Innovation and Improvement \(2011\) IHI](#)

7 Outpatient Adverse Event Trigger Tool. In: Improvement IfH, editor.  
8  
9 Cambridge.

Formatted: Font color: Auto

10  
11  
12  
13 Table 1 The Paediatric Trigger Tool (PTT) items as depicted in the NHS PTT User  
14 Guide[4]  
15  
16

|                       | Item                                                                     |
|-----------------------|--------------------------------------------------------------------------|
| <b>General care</b>   | PG1 Early warning score                                                  |
|                       | PG2 Tissue damage or pressure ulcer                                      |
|                       | PG3 Readmission within 30 days                                           |
|                       | PG4 Unplanned admission                                                  |
|                       | PG5 Abnormal cranial imaging                                             |
|                       | PG6 Respiratory or cardiac arrest / crash calls                          |
|                       | PG7 Diagnostic imaging for embolus / thrombus +/- confirmation           |
|                       | PG8 Complication of procedure or treatment                               |
|                       | PG9 Transfer to higher level of care                                     |
|                       | PG10 Hypoxia O2 sat <85%                                                 |
|                       | PG11 Cancelled elective procedure / delayed discharge                    |
| <b>Surgical care</b>  | PS1 Return to theatre                                                    |
|                       | PS2 Change in planned procedure                                          |
|                       | PS3 Surgical site infection or hospital acquired urinary tract infection |
|                       | PS4 Removal/injury/repair of organ                                       |
| <b>Intensive care</b> | IP1 Readmission to Intensive Care or High Dependency Care                |
| <b>Medication</b>     | PM1 Vitamin K (except for routine dose in neonates)                      |
|                       | PM2 Naloxone                                                             |
|                       | PM3 Flumazenil (Romazicon)                                               |
|                       | PM4 Glucagon or glucose $\geq 10\%$                                      |
|                       | PM5 Chlorphenamine or antihistamine                                      |
|                       | PM6 Anti-emetics                                                         |
|                       | PM7 IV Bolus $\geq 10\text{ml/kg}$ colloid or crystalloid given          |
|                       | PM8 Abrupt medication stop                                               |
| <b>Lab test</b>       | PL15 Thrombocytopenia (platelets <100)                                   |
|                       | PL1 High INR >5 or aPTT >100                                             |
|                       | PL2 Transfusion                                                          |
|                       | PL3 Abrupt drop in Hb or Hct (>25%)                                      |
| <b>Biochemistry</b>   | PL4 Rising urea or creatinine (>2x baseline)                             |
|                       | PL5/PL6 Electrolyte abnormalities (Na+ <130 or >150, K+ <3.0 or >6.0)    |
|                       | PL7 Hypoglycemia (<3mmol/l)                                              |
|                       | PL8 Hyperglycemia (>12mmol/l)                                            |
|                       | PL9 Drug level out of range                                              |
| <b>Microbiology</b>   | PL10 MRSA bacteraemia                                                    |
|                       | PL11 C. difficile                                                        |
|                       | PL12 Vanc resistant enterococcus (VRE)                                   |
|                       | PL13 Nosocomial pneumonia                                                |
|                       | PL14 Positive blood culture                                              |
| <b>Other</b>          | PO1 Other event                                                          |

Table 2 Distribution of trigger positive admissions and outpatient contacts across specialties

|                        | Pediatric |            | Ortopedic |            | General surgical |            | Ear, nose and throat |            |
|------------------------|-----------|------------|-----------|------------|------------------|------------|----------------------|------------|
|                        | Admitted  | Outpatient | Admitted  | Outpatient | Admitted         | Outpatient | Admitted             | Outpatient |
| Total n (%)            | 356 (47)  | 228 (30)   | 70 (9)    | 13 (2)     | 41 (5)           | 22 (3)     | 27 (3.5)             | 4 (0.5)    |
| Trigger positive n (%) | 148 (61)  | 59 (24.5)  | 8 (3.5)   | 3 (1)      | 10 (4)           | 2 (1)      | 11 (4.5)             | 1 (0.5)    |
| Harm n                 | 26        | 3          | 3         | 2          | 1                | 2          | 11                   | 0          |

Table 3 The triggers we identified in our study are presented with positive predictive value (PPV) with 95% confidence interval (CI) for identifying harm. The numerator represents number of harm events and the denominator how many times each individual trigger was found in all patient contacts (n=761)

|                       | Item                                                                                                 | PPV (CI)%        |
|-----------------------|------------------------------------------------------------------------------------------------------|------------------|
| <b>General care</b>   | PG1 Early warning score                                                                              |                  |
|                       | PG2 Tissue damage or pressure ulcer                                                                  |                  |
|                       | PG3 Readmission within 30 days                                                                       | 24/175=14 (9-20) |
|                       | PG4 Unplanned admission                                                                              |                  |
|                       | PG5 Abnormal cranial imaging                                                                         |                  |
|                       | PG6 Respiratory or cardiac arrest / crash calls                                                      | 0/1=0 (0-95)     |
|                       | PG7 Diagnostic imaging for embolus / thrombus +/- confirmation                                       | 1/2=50 (3-97)    |
|                       | PG8 Complication of procedure or treatment                                                           | 17/23=74 (51-89) |
|                       | PG9 Transfer to higher level of care                                                                 | 3/22=14 (4-36)   |
|                       | PG10 Hypoxia O2 sat <85%                                                                             | 0/25=0 (0-17)    |
|                       | PG11 Cancelled elective procedure / delayed discharge                                                | 1/1=100 (5-100)  |
| <b>Surgical care</b>  | PS1 Return to theatre                                                                                | 1/1=100 (5-100)  |
|                       | PS2 Change in planned procedure                                                                      |                  |
|                       | PS3 Surgical site infection or hospital acquired urinary tract infection                             | 6/6=100 (52-100) |
|                       | PS4 Removal/injury/repair of organ                                                                   |                  |
| <b>Intensive care</b> | IP1 Readmission to Intensive Care or High Dependency Care                                            |                  |
| <b>Medication</b>     | PM1 Vitamin K (except for routine dose in neonates)                                                  |                  |
|                       | PM2 Naloxone                                                                                         |                  |
|                       | PM3 Flumazenil (Romazicon)                                                                           |                  |
|                       | PM4 Glucagon or glucose $\geq 10\%$                                                                  |                  |
|                       | PM5 Chlorphenamine or antihistamine                                                                  | 0/1=0 (0-95)     |
|                       | PM6 Anti-emetics                                                                                     |                  |
|                       | PM7 IV Bolus $\geq 10\text{ml/kg}$ colloid or crystalloid given                                      | 3/19=16 (4-40)   |
|                       | PM8 Abrupt medication stop                                                                           |                  |
| <b>Lab test</b>       | PL15 Thrombocytopenia (platelets <100)                                                               | 0/7=0 (0-44)     |
|                       | PL1 High INR >5 or aPTT >100                                                                         |                  |
|                       | PL2 Transfusion                                                                                      | 2/8=25 (4-64)    |
|                       | PL3 Abrupt drop in Hb or Hct (>25%)                                                                  | 2/8=25 (4-64)    |
| <b>Biochemistry</b>   | PL4 Rising urea or creatinine (>2x baseline)                                                         | 0/1=0 (0-95)     |
|                       | PL5/PL6 Electrolyte abnormalities ( $\text{Na}^+ < 130$ or $> 150$ , $\text{K}^+ < 3.0$ or $> 6.0$ ) | 0/12=0 (0-30)    |
|                       | PL7 Hypoglycemia (<3mmol/l)                                                                          | 3/8=38 (10-74)   |

|                     |                                        |                  |
|---------------------|----------------------------------------|------------------|
|                     | PL8 Hyperglycemia (>12mmol/l)          | 0/1=0 (0-95)     |
|                     | PL9 Drug level out of range            |                  |
| <b>Microbiology</b> | PL10 MRSA bacteraemia                  |                  |
|                     | PL11 C. difficile                      |                  |
|                     | PL12 Vanc resistant enterococcus (VRE) |                  |
|                     | PL13 Nosocomial pneumonia              | 2/2=100 (20-100) |
|                     | PL14 Positive blood culture            | 1/1=100 (5-100)  |
| <b>Other</b>        | PO1 Other event                        |                  |

Table 4 Rate of trigger positive contacts, rate of harm and positive predictive value (PPV) of positive triggers across specialties

| Specialty            | Rate of trigger positive contacts | Rate of harm  | PPV   |
|----------------------|-----------------------------------|---------------|-------|
| Pediatric            | 207/584 (35.4%)                   | 29/584 (5.0%) | 14%   |
| Orthopedic surgery   | 11/83 (13.3%)                     | 5/83 (6.0%)   | 45.5% |
| General surgery      | 12/63 (19.0%)                     | 3/63 (4.8%)   | 25%   |
| Ear, Nose and Throat | 12/31 (38.7%)                     | 11/31 (35.5%) | 91.7% |
| Total                | 242/761 (31.8%)                   | 48/761 (6.3%) | 19.8% |
